# Supplementary material
Source: PubMed Central journal article supplement (PMC2891985)
Supplement: NIHMS204700-supplement-Supp.pdf [file NIHMS204700-supplement-Supp.pdf]

## Supplementary Appendix

This appendix has been provided by the authors to give readers additional information about their work.

Supplement to: Jin Y, Birlea SA, Fain PR, et al. Variant of *TYR* and autoimmunity susceptibility loci in generalized vitiligo. *N Engl J Med* 2010;362:1686-97. DOI: 10.1056/NEJMoa0908547.

## **SUPPLEMENTARY APPENDIX. TABLE OF CONTENTS**

- I. Methods**
- II. Results**
- III. References**
- IV. Legends to Supplementary Figures**
- V. Supplementary Appendix Figure 1.** Detailed association results from the genomewide association study for the most significant association signals.
- VI. Supplementary Appendix Figure 2.** Linkage disequilibrium plot across the *TYR* region of chromosome 11q14.3.
- VII. Supplementary Appendix Table 1.** Summary description of the samples used in this study.
- VIII. Supplementary Appendix Table 2.** Linkage disequilibrium among MHC SNPs strongly associated with generalized vitiligo.
- IX. Supplementary Appendix Table 3.** Second locus effect tests of strongly-associated HLA region SNPs in a forward stepwise regression procedure for the vitiligo phenotype, based on data from the genomewide association study.
- X. Supplementary Appendix Table 4A.** Allelic association analyses of most significant SNPs comparing generalized vitiligo patients with concomitant other autoimmune diseases versus controls (genomewide association study data).
- XI. Supplementary Appendix Table 4B.** Allelic association analyses of most significant SNPs comparing generalized vitiligo patients without concomitant other autoimmune diseases versus controls (genomewide association study data).

- XII. Supplementary Appendix Table 4C.** Allelic association analyses of most significant SNPs comparing generalized vitiligo patients with concomitant other autoimmune diseases versus controls (replication set 1 data).
- XIII. Supplementary Appendix Table 4D.** Allelic association analyses of most significant SNPs comparing generalized vitiligo patients without concomitant other autoimmune diseases versus controls (replication set 1 data).
- XIV. Supplementary Appendix Table 5.** Association analysis of non-synonymous *TYR* SNPs.
- XV. Supplementary Appendix Table 6.** Linkage disequilibrium among *TYR* region SNPs.
- XVI. Supplementary Appendix Table 7.** Association of *NALP1* SNPs with generalized vitiligo in the genomewide association study and replication analyses.

## **METHODS**

### **SUBJECTS**

The genomewide association study included 1514 non-Hispanic/Latino European-derived white (CEU) generalized vitiligo patients whose single-nucleotide polymorphism (SNP) genotypes were determined and compared to those of 2813 “public” CEU control individuals genotyped using the Illumina 1M BeadChip: 502 from the CIDR: Collaborative Study on the Genetics of Alcoholism (COGA) dataset and 2731 from the Study of Addiction: Genetics and Environment (SAGE) dataset, obtained from the Database of Genotypes and Phenotypes (dbGaP), and 82 obtained from the Illumina iControlDB. Clinical history of vitiligo and other autoimmune diseases for these controls was not available.

Replication set 1 included 677 unrelated patients and 1106 CEU non-vitiligo controls from North America and Europe, principally spouses of vitiligo patients from the genomewide association study and replication set 1, all with no known relatives with vitiligo. Replication set 2 included 183 simplex parents-affected offspring trios and 332 unrelated multiplex families, consisting of two or more affected family members and relevant unaffected relatives (1383 individuals), from North America and Europe. Patients, relatives, and replication set 1 controls provided clinical history regarding vitiligo and other autoimmune diseases.

Written informed consent was obtained from all study subjects. This study was approved by each institutional review board and was conducted according to Declaration of Helsinki principles.

### **GENOTYPING AND QUALITY CONTROL**

Genomic DNA was prepared from peripheral-blood specimens by standard methods or from saliva specimens with use of a DNA self-collection kit using the manufacturer’s instructions

(Oragene, DNA Genotek). For genomewide genotyping, DNA concentrations were assayed by both ultraviolet  $A_{260}$  spectrophotometry (Nanodrop, Thermo Scientific) and fluorescence staining (PicoGreen method, Invitrogen). For genotyping individual SNPs, DNA concentrations were assayed by ultraviolet  $A_{260}$  spectrophotometry (NanoDrop).

Quality control filtering of the genomewide genotyping data was performed using Illumina GenomeStudio, version 3 and PLINK software,<sup>1</sup> version 1.05 (<http://pngu.mgh.harvard.edu/purcell/plink/>). Cases were excluded on the basis of SNP call rates < 98.5% ( $N = 30$ ), discordance between reported and observed sex ( $n = 13$ ), and/or inadvertent subject duplication ( $N = 12$ ). Beyond prior quality control procedures, controls were excluded on the basis of SNP call rates < 95% ( $N = 0$ ). Additional cases ( $N = 19$ ) and controls ( $N = 2$ ) were excluded on the basis of cryptic relatedness based on pair-wise identity-by-descent estimation ( $\hat{P}_i > 0.05$ ), in which case the individual with lower SNP call rate was excluded. SNPs were excluded on the basis of observed minor allele frequency < 0.01 ( $N = 30,773$ ), significant deviation ( $P < 10^{-5}$ ) from Hardy-Weinberg equilibrium in the control dataset ( $N = 3,275$ ), missing rate of 2% overall ( $N = 13,153$ ) in cases plus controls, and/or significant difference ( $P < 10^{-5}$ ) in missing rate in cases versus controls ( $N = 13,985$ ). Data for SNPs with  $P$  values <  $10^{-15}$  were reviewed with respect to allele calls, genotype clusters, and minor allele frequency in controls compared to data in public data sources, and were excluded if there were apparent data quality problems ( $N = 21$ ). To control for population stratification, we used genetic matching (GEM),<sup>2</sup> which removes genetic outliers and unmatchable cases and controls based on genetic similarities derived from eigenvector decomposition (EVD). We selected a subset of 21,642 independent SNPs in controls by using the H-clust algorithm<sup>3</sup> with an  $r^2$  cut-off value of 0.04. The initial, outlier-removal step of GEM created a matrix of data for these SNPs in all cases and

controls, detecting 25 significant eigenvector axes, and excluded as outliers 7 cases and 79 controls with ancestry coefficients  $> 6$  SD in at least one of these eigenvector axes. After re-computing EVD, there were 4 significant eigenvector axes, and 38 additional cases and 95 controls were excluded for whom distances from the case to the nearest control (and vice-versa) defined by significant eigenvectors were greater than the cut-off value of 0.02. EVD was then recalculated, identifying 3 significant eigenvectors. Hierarchical groups of mutually exclusive subsets based on these significant EVD were formed using Ward's algorithm, inter-individual distances were rescaled, and 4 additional cases and 8 controls were removed.

In replication sets 1 and 2 we successfully determined genotypes for 48 SNPs that showed genome-wide significant ( $P < 5 \times 10^{-8}$ ) or near-significant P values in the genome-wide association study by use of the Sequenom MassArray iPLEX genotyping system. SNP genotypes were subjected to quality control filters similar to those in the genome-wide association study, as appropriate. In addition, for replication set 2 family data were subjected to Mendelian error-checking, and incompatibilities were either resolved or the incompatible individual or entire family was excluded. SNP genotypes could not be determined for MHC SNPs rs12206499 and rs34518860 for technical reasons. Therefore, genotypes for MHC SNP rs12206499 in replication set 1 were imputed by use of MaCH,<sup>4</sup> ver.1.0 (<http://www.sph.umich.edu/csg/abecasis/MACH/download/>) based on patterns of haplotype variation in the HapMap<sup>5</sup> CEU samples (release 24); genotypes for rs34518860 could not be reliably imputed. Genotypes were also imputed for *NALP1* region SNPs rs12150220, rs11078575, rs878329, and rs4790796 in the genome-wide association study, and for *TYR* SNP rs1126809 in the genome-wide association study and replication set 1.

## STATISTICAL ANALYSES

For the genomewide association study, after quality control filtering of subjects and SNP data, we first compared allele frequencies of the remaining 520,460 SNPs in the 1441 remaining patients and 2811 controls using the Cochran-Armitage trend test implemented in PLINK,<sup>1</sup> which yielded a genomic inflation factor ( $\lambda$ ) of 1.054. After removing genetic outliers and unmatchable individuals using GEM,<sup>2</sup> we then compared SNP allele frequencies in the final 1392 patients and 2629 controls using the unadjusted Cochran-Armitage trend test implemented in PLINK<sup>1</sup> and the adjusted Cochran-Armitage trend test implemented in EIGENSTRAT,<sup>6</sup> in which both phenotypes and genotypes of subjects were adjusted for ancestry using the top ten eigenvectors. Both of these tests yielded a genomic inflation factor of 1.048, indicating that residual population stratification was minimal. We then used the genomic control method<sup>7</sup> to correct the PLINK and EIGENSTRAT test statistics for this inflation factor. Odds ratios and 95% confidence limits were calculated by logistic regression analysis by use of PLINK.<sup>1</sup>

For replication set 1, after quality control filtering, we compared allele frequencies for genotyped and imputed SNPs in the remaining 647 patients and 1056 controls using the unadjusted Cochran-Armitage trend test. Odds ratios and 95% confidence limits were calculated by logistic regression analysis. For replication set 2, we calculated the association of each SNP with vitiligo using the family-based association test (FBAT),<sup>8</sup> version 1.5.5. Odds ratios and 95% confidence limits were calculated by conditional logistic regression analysis, which uses family-based data to create a matched case-pseudocontrol dataset.<sup>9</sup> To obtain combined ORs and P values, we performed meta-analysis using a Cochran-Mantel-Haenszel test with cases and controls from the genomewide association study and replication set 1, and cases and pseudocontrols from replication set 2 families. Genotype data for patients from the genomewide

association study and summary statistical results can be obtained by application to dbGaP [<http://www.ncbi.nlm.nih.gov/sites/Entrez?Db-gap>], accession number phs000224.v1.p1.

Calculation of linkage disequilibrium between SNPs in regions of association was carried out with Haploview software,<sup>10</sup> version 4.1. To distinguish independent associations in the MHC from secondary association due to linkage disequilibrium, we applied logistic regression analysis to the 22 MHC SNPs that showed strongest association with disease in the genomewide association study. As a test of the independent effect of a given locus conditioned on the effect of another locus, we compared the fit of a model containing both loci to a model containing only the conditioning locus, assuming a multiplicative genotypic effect for the high-risk allele of each locus. Analyses were performed using STATA, version 10.0 (<http://www.stata.com>).

We tested interaction between *HLA-A* SNP rs12206499 and *TYR* SNP rs1393350, and between *HLA-A* SNP rs12206499 and HLA class II region SNP rs532098 by logistic regression analysis, comparing the fit of a model containing both the main effects and interaction of the two loci to a model containing only the marginal effects of the two loci, using log-additive coding for each genotype and interaction between the two loci.<sup>11</sup> These analyses included SNP genotypes from the genomewide association study and replication set 1 and were performed using STATA.

The fraction of genetic variance accounted for by each of the two MHC region SNPs that showed independent association and the eight independent signals on other chromosomes, and by all ten loci combined, was calculated as Pseudo  $R^2$  by logistic regression analysis of genomewide association study and replication set 1 data using STATA, assuming a multiplicative model for each SNP and a polygenic multiplicative model for all ten loci combined.<sup>12</sup>



## RESULTS

### ANALYSIS OF *NALP1* (*NLRP1*) REGION SNPs

We<sup>13</sup> and others<sup>14</sup> previously detected genetic linkage of generalized vitiligo with microsatellite markers on chromosome 17p13, specifically in families with both vitiligo and other autoimmune diseases, and by family-based association analysis of SNPs genotyped across the linkage region in the same families we then localized this signal to the *NALP1* (*NLRP1*) gene region, and then replicated these associations in a second cohort of multiplex families.<sup>15</sup> We subsequently verified association with the same high-risk alleles of the same *NALP1* SNPs in an independent cohort of generalized vitiligo cases and controls collected in northwest Romania.<sup>16</sup> *NALP1* encodes a key component of the NALP1 inflammasome that mediates innate immune responses to environmental triggers.<sup>17</sup>

In the present genomewide association study, only one of the previous highly associated *NALP1* SNPs was present on the Illumina 610 microarray, rs6502867 (P = 0.17, odds ratio 1.09); see Supplementary Table 7). Four other of the previous highly associated *NALP1* region SNPs were imputed; rs12150220 (P = 0.09, odds ratio 1.09), rs11078575 (P = 0.08, odds ratio 1.09); rs878329 (P = 0.11, odds ratio 1.08); and rs4790796 (P = 0.14, odds ratio 1.08), all showing at-best marginal association with the same high-risk allele as observed previously.<sup>15,16</sup>

Stratification of cases into those with versus without concomitant other autoimmune diseases did not identify a more significantly-associated subset of patients.

In replication sets 1 and 2 we genotyped the four previously most-associated *NALP1* SNPs (see Supplementary Table 7). In the case-control replication set 1, none of the previous high-risk alleles of these SNPs were significantly associated with vitiligo. In contrast, in the family-based replication set 2 the high-risk alleles of all four markers were significantly

associated: rs6502867,  $P = 5.84 \times 10^{-3}$ ; rs12150220,  $P = 3.52 \times 10^{-3}$ ; rs2670660,  $P = 1.33 \times 10^{-3}$ ; rs8182352,  $P = 1.13 \times 10^{-3}$ .

These results suggest that *NALP1* may be differentially associated with generalized vitiligo in the context of multiplex families versus singleton cases, consistent with the fact that the chromosome 17p13 signal was initially detected by genetic linkage analysis, particularly in the subset of multiplex families with concomitant other autoimmune diseases,<sup>13,14</sup> which are not typical among all vitiligo cases. However, this interpretation is biased by the fact that the present replication set 2 included the 114 multiplex families in which we originally detected linkage and association.<sup>15</sup> Nevertheless, we subsequently detected association with the same high-risk alleles of these *NALP1* SNPs in singleton generalized vitiligo cases versus controls from three adjacent counties in northwestern Romania, unselected with respect to concomitant autoimmune disease.<sup>16</sup> To determine whether high-risk *NALP1* alleles are particularly associated with disease in this limited geographical region, we stratified multiplex families and trios from this geographical region of Romania that were included in replication set 2 and were not included in the previous family-based study.<sup>16</sup> As shown in Supplementary Table 7, all four of these SNPs showed significant association in the Romanian family subset: rs6502867,  $P = 8.72 \times 10^{-3}$ , odds ratio 1.58; rs12150220,  $2.42 \times 10^{-3}$ , odds ratio 1.84; rs2670660,  $P = 8.34 \times 10^{-3}$ , odds ratio 1.92; rs8182352,  $P = 8.92 \times 10^{-3}$ , odds ratio 1.99; these odds ratios were even higher in the subset of families with other concomitant autoimmune diseases. These Romanian families derive from the same limited geographical region as the previous Romanian case-control cohort,<sup>16</sup> and show association to the same high-risk SNP alleles, suggesting that the population from this geographically delimited region may be relatively homogeneous with respect to *NALP1* and vitiligo, with particularly high risk for patients and families with concomitant other autoimmune

diseases. Overall, these results support association of generalized vitiligo with *NALP1*, but suggest the likelihood of genetic heterogeneity with respect to *NALP1* association with generalized vitiligo in the wider CEU population.

## **ADDITIONAL STUDY INFORMATION**

The study was designed by Dr. Spritz and Dr. Fain. The data were gathered by Dr. Jin, Dr. Birlea, Ms. Gowan, and Ms. Riccardi. The data were analyzed and are vouched for by Dr. Jin, Dr. Birlea, Dr. Fain, and Dr. Spritz. The manuscript was written by Dr. Spritz, Dr. Fain, and Dr. Jin, and all authors decided to publish the paper; Dr. Spritz wrote the first draft. This study was performed with prior agreement between the sponsor (National Institutes of Health) and Dr. Spritz that de-identified data from the genomewide association study would be submitted to the Database of Genotypes and Phenotypes (dbGaP) for the purpose of data sharing with qualified approved investigators, subject to limitations given the consents by which the samples were originally obtained.

## REFERENCES

1. Purcell S, Neale B, Todd-Brown K, et al. PLINK: a toolset for whole-genome association and population-based linkage analysis. *Am. J. Hum. Genet.* 2007;81:559-75.
2. Luca D, Ringquist S, Klei L, et al. On the use of general control samples for genome-wide association studies: Genetic matching highlights causal variants. *Am J Hum Genet* 2008;82:453-63.
3. Rinaldo A, Bacanu SA, Devlin B, Sonpar V, Wasserman L, Roeder K. Characterization of multilocus linkage disequilibrium. *Genet Epidemiol* 2005;28:193-206.
4. Li Y, Ding J, Abecasis GR. Mach 1.0: Rapid haplotype reconstruction and missing genotype inference. *Am J Hum Genet* 2006;79: S2290.
5. International HapMap Consortium, Frazer KA, Ballinger DG, et al. A second generation human haplotype map of over 3.1 million SNPs. *Nature.* 2007;449:851-61.
6. Price AL, Patterson NJ, Plenge RM, Weinblatt ME, Shadick NA, Reich D. Principal components analysis corrects for stratification in genome-wide association studies. *Nat Genet* 2006;38:904-9.
7. Devlin B, Roeder K, Wasserman L. Genomic control, a new approach to genetic-based association studies. *Theor Popul Biol* 2001;60:155-66.
8. Horvath S, Xu X, Lake SL, Silverman EK, Weiss ST, Laird NM. Family-based tests for associating haplotypes with general phenotype data: application to asthma genetics. *Genet Epidemiol* 2004;26:61-9.
9. Cordell HJ, Clayton DG. A unified stepwise regression procedure for evaluating the relative effects of polymorphisms within a gene using case/control or family data: application to HLA in type 1 diabetes. *Am J Hum Genet* 2002;70:124-41.

10. Barrett JC, Fry B, Maller J, Daly MJ. Haploview: analysis and visualization of LD and haplotype maps. *Bioinformatics* 2005;21:263-5.
11. Millstein J, Conti DV, Gilliland FD, Auderman WJ. A testing framework for identifying susceptibility genes in the presence of epistasis. *Am J Hum Genet* 2006;78:15-27.
12. Clayton DG. Prediction and interaction in complex disease genetics: experience in type 1 diabetes. *PloS Genet* 2009 ;5:e1000540.
13. Spritz RA, Gowan K, Bennett DC, Fain PR. Novel vitiligo susceptibility loci on chromosomes 7 (*AIS2*) and 8 (*AIS3*), confirmation of *SLEVI* on chromosome 17, and their roles in an autoimmune diathesis. *Am J Hum Genet* 2004;74:188-91.
14. Nath SK, Kelly JA, Namjou B, et al. Evidence for a susceptibility gene, *SLEVI*, on chromosome 17p13 in families with vitiligo-related systemic lupus erythematosus. *Am J Hum Genet* 2001;69:1401-6.
15. Jin Y, Mailloux CM, Gowan K, et al. *NALP1* in vitiligo-associated multiple autoimmune disease. *New Engl J Med* 2007;356:1216-25.
16. Jin Y, Birlea SA, Fain PR, Spritz RA. Genetic variations in *NALP1* are associated with generalized vitiligo in a Romanian population. *J Investig Dermatol* 2007;127:2558-2562.
17. Gregersen P. Modern genetics, ancient defenses, and potential therapies. *New Engl J Med* 2007;356:1263-6.

## Legends to Supplementary Figures

**Supplementary Appendix Figure 1.** Detailed association results from the genomewide association study for the most significant association signals.  $-\log_{10}(P \text{ values})$  for SNPs located in chromosome segments A, 1p13.2; B, 1p36.23; C, 3q28; D, 10p15.1; E, 11q14.3; F, 14q12; G, 21q22.3; H, 22q13.1.

**Supplementary Appendix Figure 2.** Linkage disequilibrium plot across the *TYR* region of chromosome 11q14.3. Linkage disequilibrium ( $r^2$ ) for 8 *TYR* SNPs, of which 7 were highly associated with generalized vitiligo, graphed against the physical positions of the markers (Build 36.1 from the National Center for Biotechnology Information).

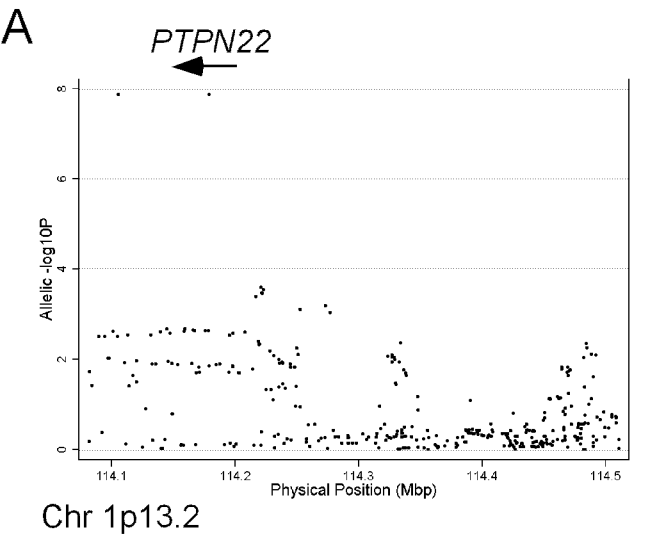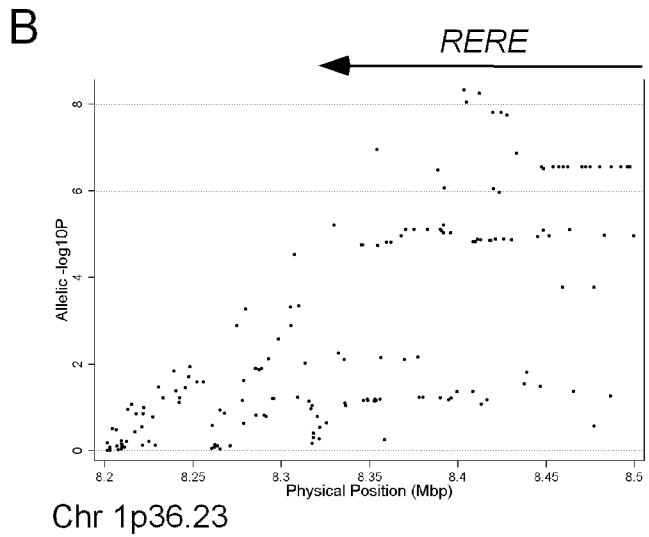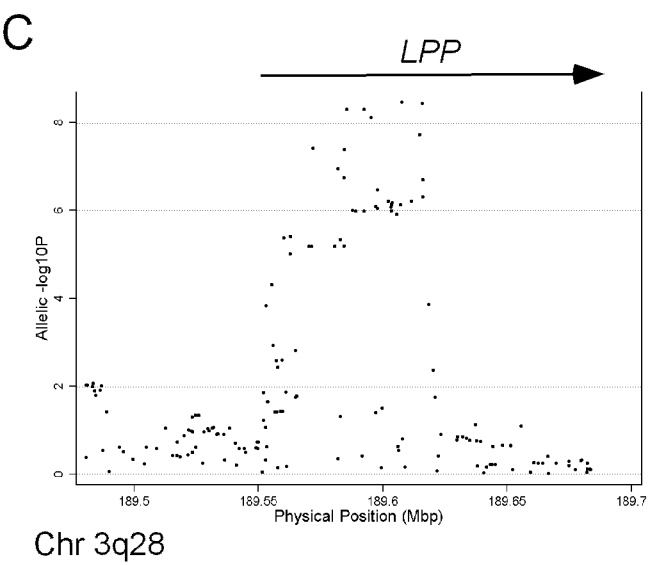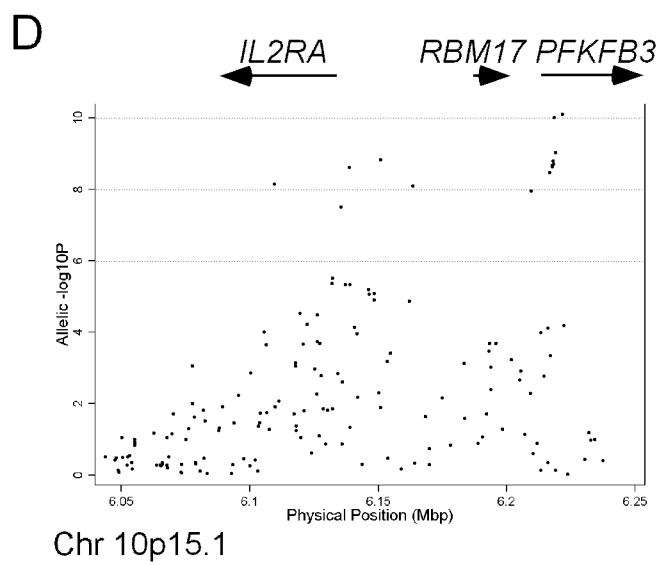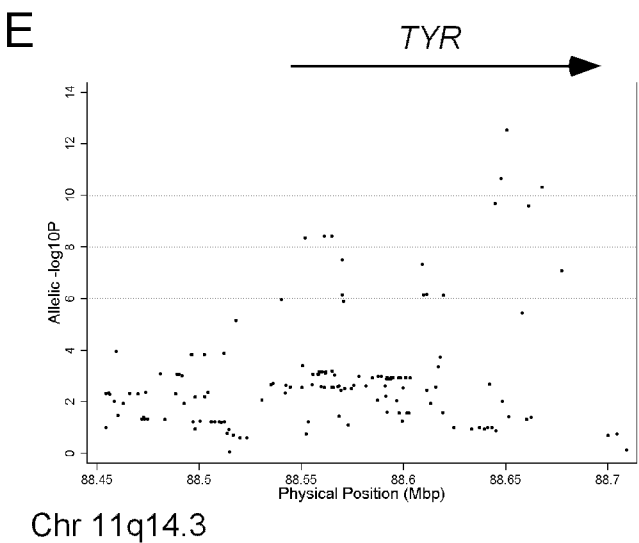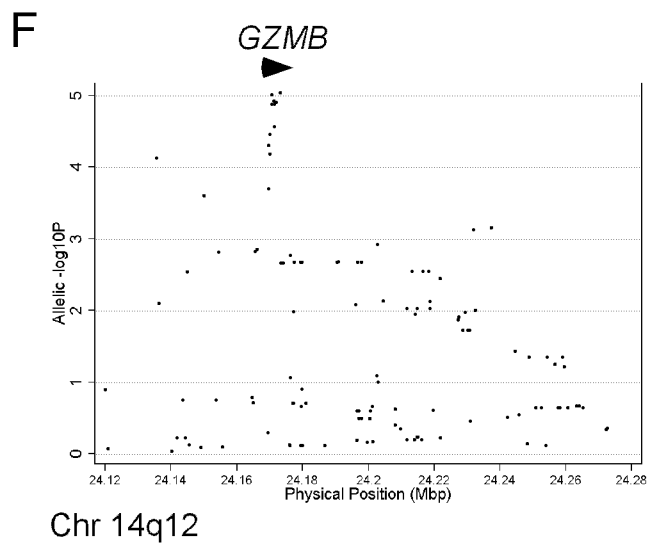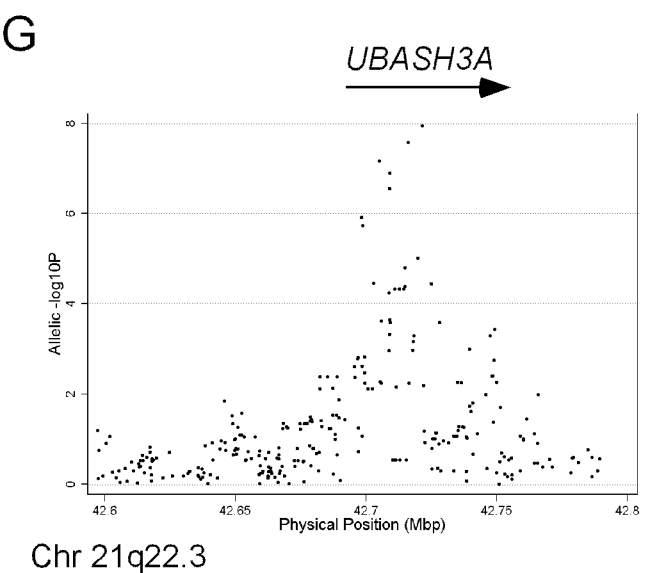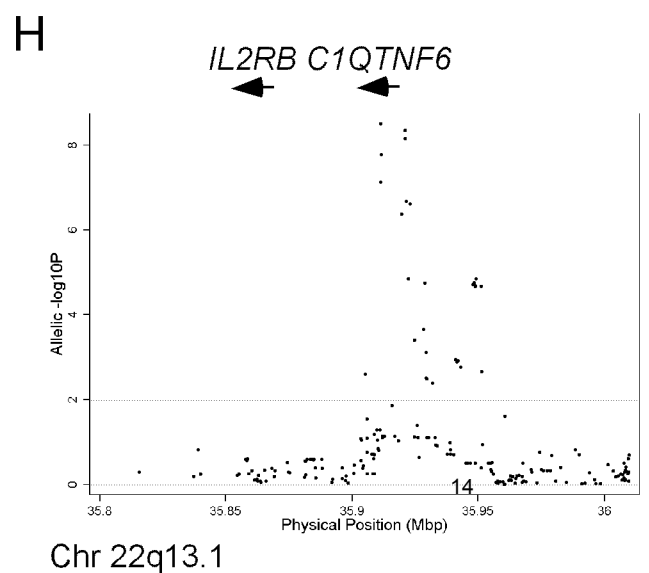

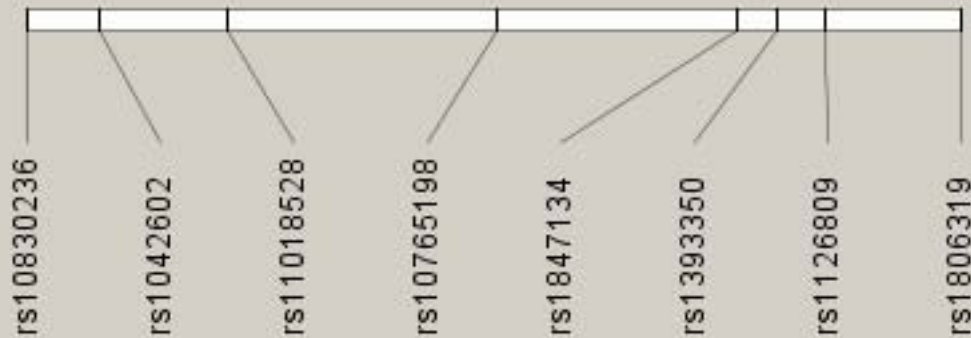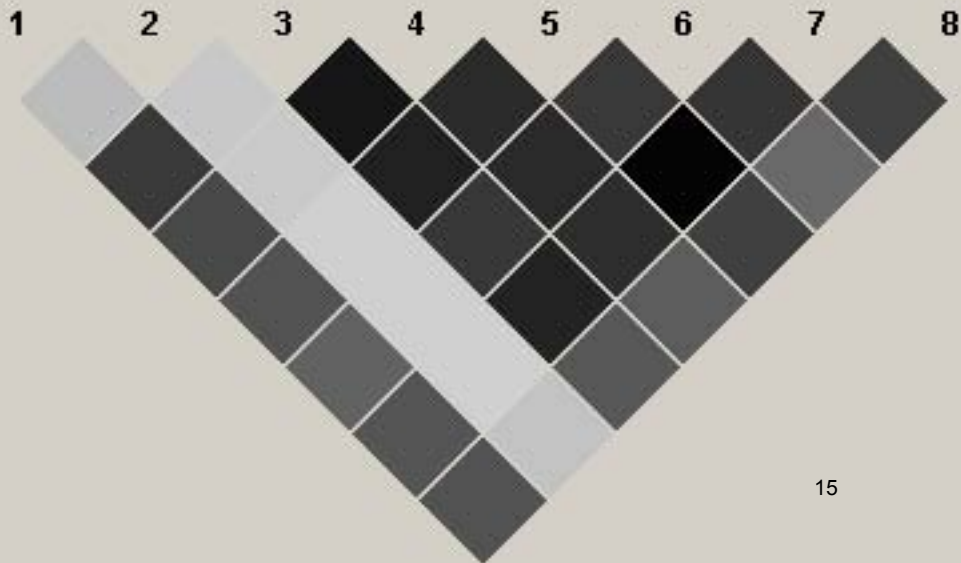



**Supplementary Appendix Table 1. Summary description of the samples used in this study**

|                                              | <u>Generalized vitiligo patients</u> |                                 |          |                                                               | <u>Controls</u> |          |                                                               | <u>Other family members</u> |               |                                                               |
|----------------------------------------------|--------------------------------------|---------------------------------|----------|---------------------------------------------------------------|-----------------|----------|---------------------------------------------------------------|-----------------------------|---------------|---------------------------------------------------------------|
|                                              | N                                    | Mean age of onset<br>$\pm$ s.d. | % Female | Occurrence of<br>other autoimmune<br>disease (%) <sup>a</sup> | N               | % Female | Occurrence of<br>other autoimmune<br>disease (%) <sup>a</sup> | N                           | Female<br>(%) | Occurrence of<br>other autoimmune<br>disease (%) <sup>a</sup> |
| Genomewide<br>association study <sup>b</sup> | 1514                                 | 24.41 $\pm$ 16.5                | 70.1     | 31.6                                                          | 2813            | 55.2     | Unknown                                                       |                             |               |                                                               |
| Replication set 1                            | 677                                  | 25.61 $\pm$ 15.93               | 63.4     | 20.58                                                         | 1106            | 50.1     | 3.51                                                          |                             |               |                                                               |
| Replication set 2                            | 1032 <sup>c</sup>                    | 20.65 $\pm$ 15.01               | 63.2     | 22.7                                                          |                 |          |                                                               | 1021 <sup>d</sup>           | 51.5          | 24.2                                                          |

The genomewide association study utilized data from public controls (see Methods), for whom clinical history regarding vitiligo and other autoimmune diseases was not available. Replication set 1 utilized non-vitiligo controls from North America and the United Kingdom, almost all spouses of patients from the genomewide association study and replication set 1, with no other known family history of vitiligo.

<sup>a</sup> Includes autoimmune thyroid disease, rheumatoid arthritis, psoriasis, adult-onset autoimmune diabetes, pernicious anemia, Addison's disease, and systemic lupus erythematosus, which are the principal autoimmune diseases that are epidemiologically associated with generalized vitiligo.<sup>5,6</sup>

<sup>b</sup> Twenty-four cases were excluded from the summary data due to inadvertent sample duplication or discordant sex.

<sup>c</sup> Genotyped affected family members

<sup>d</sup> Genotyped unaffected family members

**SUPPLEMENTARY APPENDIX TABLE 2.** Linkage disequilibrium among MHC SNPs strongly associated with generalized vitiligo

| <u>Locus 1</u> | <u>Locus 2</u> | <u>r<sup>2</sup></u> | <u>D'</u> | <u>lod</u> | <u>CI<sub>lower</sub></u> | <u>CI<sub>upper</sub></u> | <u>Distance (bp)</u> |
|----------------|----------------|----------------------|-----------|------------|---------------------------|---------------------------|----------------------|
| rs2975033      | rs2517715      | 0.76                 | 0.963     | 1074.3     | 0.95                      | 0.98                      | 95178                |
| rs2975033      | rs3903160      | 0.943                | 0.976     | 1461.6     | 0.96                      | 0.99                      | 110636               |
| rs2975033      | rs6457110      | 0.552                | 0.931     | 720.56     | 0.91                      | 0.95                      | 111620               |
| rs2975033      | rs3893464      | 0.334                | 0.958     | 435.74     | 0.94                      | 0.98                      | 112989               |
| rs2975033      | rs12206499     | 0.863                | 0.942     | 1249.73    | 0.93                      | 0.96                      | 114866               |
| rs2975033      | rs3823355      | 0.852                | 0.928     | 1223.42    | 0.91                      | 0.94                      | 119822               |
| rs2975033      | rs6904029      | 0.851                | 0.927     | 1222.75    | 0.91                      | 0.94                      | 120806               |
| rs2975033      | rs3823375      | 0.73                 | 0.925     | 985.57     | 0.91                      | 0.94                      | 121897               |
| rs2975033      | rs4947244      | 0.886                | 0.977     | 1309.5     | 0.96                      | 0.99                      | 132103               |
| rs2975033      | rs4959039      | 0.885                | 0.976     | 1306.49    | 0.96                      | 0.99                      | 134808               |
| rs2975033      | rs9357092      | 0.876                | 0.969     | 1283.58    | 0.95                      | 0.98                      | 161991               |
| rs2975033      | rs9366752      | 0.673                | 0.968     | 887.02     | 0.95                      | 0.98                      | 202416               |
| rs2975033      | rs4711209      | 0.877                | 0.972     | 1286.32    | 0.96                      | 0.99                      | 225142               |
| rs2975033      | rs6909253      | 0.443                | 0.869     | 544.38     | 0.84                      | 0.89                      | 233382               |
| rs2975033      | rs9261394      | 0.438                | 0.869     | 535.8      | 0.84                      | 0.89                      | 242301               |
| rs2975033      | rs9262582      | 0.063                | 0.525     | 57.99      | 0.47                      | 0.58                      | 1192044              |
| rs2975033      | rs9263607      | 0.056                | 0.439     | 51.17      | 0.38                      | 0.49                      | 1249896              |
| rs2975033      | rs17190526     | 0.058                | 0.449     | 54.18      | 0.4                       | 0.5                       | 1259820              |
| rs2975033      | rs9263823      | 0.063                | 0.513     | 59.47      | 0.46                      | 0.57                      | 1324833              |
| rs2975033      | rs7758128      | 0.006                | 0.267     | 5.6        | 0.17                      | 0.36                      | 2523021              |
| rs2975033      | rs3806156      | 0.007                | 0.103     | 6.72       | 0.06                      | 0.14                      | 2551436              |
| rs2975033      | rs2395185      | 0.002                | 0.045     | 1.54       | 0.01                      | 0.08                      | 2610905              |
| rs2975033      | rs2516049      | 0.002                | 0.049     | 1.92       | 0.01                      | 0.09                      | 2748138              |
| rs2975033      | rs532098       | 0.009                | 0.136     | 7.74       | 0.09                      | 0.18                      | 2755790              |
| rs2975033      | rs34518860     | 0.003                | 0.098     | 2.67       | 0.04                      | 0.15                      | 2771841              |
| rs2517715      | rs3903160      | 0.732                | 0.95      | 1008.55    | 0.93                      | 0.97                      | 15458                |
| rs2517715      | rs6457110      | 0.733                | 0.972     | 1057.7     | 0.96                      | 0.99                      | 16442                |
| rs2517715      | rs3893464      | 0.41                 | 0.962     | 543.54     | 0.94                      | 0.98                      | 17811                |
| rs2517715      | rs12206499     | 0.712                | 0.922     | 959.67     | 0.9                       | 0.94                      | 19688                |
| rs2517715      | rs3823355      | 0.709                | 0.925     | 955.95     | 0.91                      | 0.94                      | 24644                |
| rs2517715      | rs6904029      | 0.709                | 0.925     | 956.51     | 0.91                      | 0.94                      | 25628                |

|           |            |       |       |         |      |      |         |
|-----------|------------|-------|-------|---------|------|------|---------|
| rs2517715 | rs3823375  | 0.591 | 0.785 | 728.82  | 0.76 | 0.81 | 26719   |
| rs2517715 | rs4947244  | 0.741 | 0.986 | 1055.54 | 0.97 | 1    | 36925   |
| rs2517715 | rs4959039  | 0.741 | 0.986 | 1053.24 | 0.97 | 1    | 39630   |
| rs2517715 | rs9357092  | 0.74  | 0.983 | 1050.62 | 0.97 | 1    | 66813   |
| rs2517715 | rs9366752  | 0.571 | 0.984 | 764.29  | 0.97 | 1    | 107238  |
| rs2517715 | rs4711209  | 0.739 | 0.985 | 1051.17 | 0.97 | 1    | 129964  |
| rs2517715 | rs6909253  | 0.372 | 0.721 | 422.45  | 0.69 | 0.75 | 138204  |
| rs2517715 | rs9261394  | 0.367 | 0.72  | 413.96  | 0.69 | 0.75 | 147123  |
| rs2517715 | rs9262582  | 0.051 | 0.525 | 47.33   | 0.46 | 0.58 | 1096866 |
| rs2517715 | rs9263607  | 0.044 | 0.43  | 40.09   | 0.37 | 0.49 | 1154718 |
| rs2517715 | rs17190526 | 0.048 | 0.449 | 44.2    | 0.39 | 0.5  | 1164642 |
| rs2517715 | rs9263823  | 0.05  | 0.505 | 46.96   | 0.44 | 0.56 | 1229655 |
| rs2517715 | rs7758128  | 0.005 | 0.269 | 4.51    | 0.16 | 0.37 | 2427843 |
| rs2517715 | rs3806156  | 0.007 | 0.094 | 6.7     | 0.06 | 0.13 | 2456258 |
| rs2517715 | rs2395185  | 0.002 | 0.046 | 1.88    | 0.01 | 0.08 | 2515727 |
| rs2517715 | rs2516049  | 0.004 | 0.063 | 3.34    | 0.03 | 0.1  | 2652960 |
| rs2517715 | rs532098   | 0.014 | 0.158 | 12.76   | 0.11 | 0.2  | 2660612 |
| rs2517715 | rs34518860 | 0.006 | 0.153 | 5.33    | 0.09 | 0.21 | 2676663 |
| rs3903160 | rs6457110  | 0.578 | 0.958 | 771.79  | 0.94 | 0.97 | 984     |
| rs3903160 | rs3893464  | 0.36  | 1     | 505.92  | 0.99 | 1    | 2353    |
| rs3903160 | rs12206499 | 0.902 | 0.969 | 1343.99 | 0.95 | 0.98 | 4230    |
| rs3903160 | rs3823355  | 0.885 | 0.951 | 1298.71 | 0.94 | 0.97 | 9186    |
| rs3903160 | rs6904029  | 0.885 | 0.95  | 1298.84 | 0.93 | 0.96 | 10170   |
| rs3903160 | rs3823375  | 0.772 | 0.956 | 1073.36 | 0.94 | 0.97 | 11261   |
| rs3903160 | rs4947244  | 0.923 | 0.992 | 1406.42 | 0.98 | 1    | 21467   |
| rs3903160 | rs4959039  | 0.922 | 0.991 | 1402.81 | 0.98 | 1    | 24172   |
| rs3903160 | rs9357092  | 0.912 | 0.984 | 1371.79 | 0.97 | 1    | 51355   |
| rs3903160 | rs9366752  | 0.706 | 0.986 | 950.78  | 0.97 | 1    | 91780   |
| rs3903160 | rs4711209  | 0.913 | 0.987 | 1375.52 | 0.97 | 1    | 114506  |
| rs3903160 | rs6909253  | 0.469 | 0.898 | 586.83  | 0.87 | 0.92 | 122746  |
| rs3903160 | rs9261394  | 0.462 | 0.898 | 576.69  | 0.87 | 0.92 | 131665  |
| rs3903160 | rs9262582  | 0.063 | 0.523 | 57.52   | 0.46 | 0.58 | 1081408 |
| rs3903160 | rs9263607  | 0.058 | 0.444 | 52.74   | 0.39 | 0.5  | 1139260 |
| rs3903160 | rs17190526 | 0.06  | 0.453 | 55.16   | 0.4  | 0.5  | 1149184 |

|           |            |       |       |        |      |      |         |
|-----------|------------|-------|-------|--------|------|------|---------|
| rs3903160 | rs9263823  | 0.063 | 0.511 | 59.31  | 0.45 | 0.57 | 1214197 |
| rs3903160 | rs7758128  | 0.006 | 0.272 | 5.94   | 0.18 | 0.36 | 2412385 |
| rs3903160 | rs3806156  | 0.007 | 0.103 | 6.54   | 0.06 | 0.14 | 2440800 |
| rs3903160 | rs2395185  | 0.002 | 0.044 | 1.44   | 0.01 | 0.08 | 2500269 |
| rs3903160 | rs2516049  | 0.002 | 0.046 | 1.63   | 0.01 | 0.08 | 2637502 |
| rs3903160 | rs532098   | 0.008 | 0.129 | 6.82   | 0.08 | 0.18 | 2645154 |
| rs3903160 | rs34518860 | 0.003 | 0.093 | 2.4    | 0.04 | 0.15 | 2661205 |
| rs6457110 | rs3893464  | 0.571 | 1     | 837.69 | 0.99 | 1    | 1369    |
| rs6457110 | rs12206499 | 0.65  | 1     | 946.65 | 0.99 | 1    | 3246    |
| rs6457110 | rs3823355  | 0.643 | 0.999 | 931.4  | 0.98 | 1    | 8202    |
| rs6457110 | rs6904029  | 0.643 | 0.999 | 931.96 | 0.98 | 1    | 9186    |
| rs6457110 | rs3823375  | 0.5   | 0.814 | 596.64 | 0.79 | 0.84 | 10277   |
| rs6457110 | rs4947244  | 0.583 | 0.993 | 816.35 | 0.98 | 1    | 20483   |
| rs6457110 | rs4959039  | 0.583 | 0.992 | 814.94 | 0.98 | 1    | 23188   |
| rs6457110 | rs9357092  | 0.584 | 0.991 | 817.22 | 0.98 | 1    | 50371   |
| rs6457110 | rs9366752  | 0.45  | 0.992 | 607.33 | 0.98 | 1    | 90796   |
| rs6457110 | rs4711209  | 0.58  | 0.99  | 809.03 | 0.98 | 1    | 113522  |
| rs6457110 | rs6909253  | 0.235 | 0.505 | 244.34 | 0.48 | 0.53 | 121762  |
| rs6457110 | rs9261394  | 0.229 | 0.502 | 236.2  | 0.47 | 0.53 | 130681  |
| rs6457110 | rs9262582  | 0.048 | 0.574 | 44.65  | 0.51 | 0.64 | 1080424 |
| rs6457110 | rs9263607  | 0.041 | 0.472 | 38.08  | 0.41 | 0.53 | 1138276 |
| rs6457110 | rs17190526 | 0.044 | 0.488 | 40.93  | 0.42 | 0.55 | 1148200 |
| rs6457110 | rs9263823  | 0.047 | 0.553 | 44.38  | 0.49 | 0.61 | 1213213 |
| rs6457110 | rs7758128  | 0.004 | 0.277 | 3.82   | 0.16 | 0.39 | 2411401 |
| rs6457110 | rs3806156  | 0.011 | 0.111 | 10.35  | 0.08 | 0.15 | 2439816 |
| rs6457110 | rs2395185  | 0.004 | 0.072 | 3.5    | 0.03 | 0.11 | 2499285 |
| rs6457110 | rs2516049  | 0.007 | 0.095 | 5.77   | 0.06 | 0.13 | 2636518 |
| rs6457110 | rs532098   | 0.017 | 0.155 | 15.81  | 0.12 | 0.19 | 2644170 |
| rs6457110 | rs34518860 | 0.005 | 0.162 | 4.66   | 0.09 | 0.23 | 2660221 |
| rs3893464 | rs12206499 | 0.373 | 1     | 524.54 | 0.99 | 1    | 1877    |
| rs3893464 | rs3823355  | 0.367 | 0.999 | 515.5  | 0.98 | 1    | 6833    |
| rs3893464 | rs6904029  | 0.367 | 0.999 | 516.55 | 0.98 | 1    | 7817    |
| rs3893464 | rs3823375  | 0.253 | 0.767 | 279.32 | 0.73 | 0.8  | 8908    |
| rs3893464 | rs4947244  | 0.332 | 0.991 | 454.85 | 0.98 | 1    | 19114   |

|            |            |       |       |         |      |      |         |
|------------|------------|-------|-------|---------|------|------|---------|
| rs3893464  | rs4959039  | 0.332 | 0.99  | 452.6   | 0.97 | 1    | 21819   |
| rs3893464  | rs9357092  | 0.333 | 0.99  | 455.48  | 0.97 | 1    | 49002   |
| rs3893464  | rs9366752  | 0.256 | 0.99  | 348     | 0.97 | 1    | 89427   |
| rs3893464  | rs4711209  | 0.33  | 0.989 | 450.34  | 0.97 | 1    | 112153  |
| rs3893464  | rs6909253  | 0.566 | 0.956 | 776.59  | 0.94 | 0.97 | 120393  |
| rs3893464  | rs9261394  | 0.552 | 0.937 | 738.01  | 0.92 | 0.96 | 129312  |
| rs3893464  | rs9262582  | 0.025 | 0.551 | 23.33   | 0.46 | 0.63 | 1079055 |
| rs3893464  | rs9263607  | 0.019 | 0.424 | 17.14   | 0.34 | 0.5  | 1136907 |
| rs3893464  | rs17190526 | 0.02  | 0.437 | 18.87   | 0.35 | 0.51 | 1146831 |
| rs3893464  | rs9263823  | 0.025 | 0.539 | 24.25   | 0.45 | 0.62 | 1211844 |
| rs3893464  | rs7758128  | 0.005 | 0.406 | 5.17    | 0.26 | 0.53 | 2410032 |
| rs3893464  | rs3806156  | 0.003 | 0.071 | 2.39    | 0.03 | 0.12 | 2438447 |
| rs3893464  | rs2395185  | 0.001 | 0.04  | 0.62    | 0    | 0.09 | 2497916 |
| rs3893464  | rs2516049  | 0.001 | 0.052 | 0.98    | 0    | 0.1  | 2635149 |
| rs3893464  | rs532098   | 0.009 | 0.108 | 8.27    | 0.07 | 0.15 | 2642801 |
| rs3893464  | rs34518860 | 0.007 | 0.256 | 7.04    | 0.17 | 0.33 | 2658852 |
| rs12206499 | rs3823355  | 0.984 | 0.998 | 1605.21 | 0.98 | 1    | 4956    |
| rs12206499 | rs6904029  | 0.983 | 0.998 | 1603.87 | 0.98 | 1    | 5940    |
| rs12206499 | rs3823375  | 0.828 | 0.981 | 1198.56 | 0.97 | 0.99 | 7031    |
| rs12206499 | rs4947244  | 0.894 | 0.992 | 1339.18 | 0.98 | 1    | 17237   |
| rs12206499 | rs4959039  | 0.894 | 0.991 | 1340.4  | 0.98 | 1    | 19942   |
| rs12206499 | rs9357092  | 0.886 | 0.985 | 1316.17 | 0.97 | 1    | 47125   |
| rs12206499 | rs9366752  | 0.681 | 0.985 | 912.08  | 0.97 | 1    | 87550   |
| rs12206499 | rs4711209  | 0.884 | 0.986 | 1311.08 | 0.97 | 1    | 110276  |
| rs12206499 | rs6909253  | 0.44  | 0.857 | 534.63  | 0.83 | 0.88 | 118516  |
| rs12206499 | rs9261394  | 0.435 | 0.858 | 525.88  | 0.83 | 0.88 | 127435  |
| rs12206499 | rs9262582  | 0.061 | 0.524 | 56.08   | 0.46 | 0.58 | 1077178 |
| rs12206499 | rs9263607  | 0.054 | 0.437 | 49.49   | 0.38 | 0.49 | 1135030 |
| rs12206499 | rs17190526 | 0.057 | 0.45  | 52.69   | 0.39 | 0.5  | 1144954 |
| rs12206499 | rs9263823  | 0.061 | 0.511 | 57.45   | 0.45 | 0.57 | 1209967 |
| rs12206499 | rs7758128  | 0.008 | 0.299 | 6.87    | 0.2  | 0.39 | 2408155 |
| rs12206499 | rs3806156  | 0.011 | 0.126 | 10.01   | 0.09 | 0.17 | 2436570 |
| rs12206499 | rs2395185  | 0.004 | 0.067 | 3.52    | 0.03 | 0.1  | 2496039 |
| rs12206499 | rs2516049  | 0.004 | 0.067 | 3.57    | 0.03 | 0.1  | 2633272 |

|            |            |       |       |         |      |      |         |
|------------|------------|-------|-------|---------|------|------|---------|
| rs12206499 | rs532098   | 0.011 | 0.156 | 10.27   | 0.11 | 0.2  | 2640924 |
| rs12206499 | rs34518860 | 0.003 | 0.093 | 2.32    | 0.04 | 0.15 | 2656975 |
| rs3823355  | rs6904029  | 0.998 | 0.999 | 1670.8  | 0.99 | 1    | 984     |
| rs3823355  | rs3823375  | 0.84  | 0.994 | 1243.01 | 0.98 | 1    | 2075    |
| rs3823355  | rs4947244  | 0.907 | 0.994 | 1374.22 | 0.98 | 1    | 12281   |
| rs3823355  | rs4959039  | 0.907 | 0.993 | 1374.27 | 0.98 | 1    | 14986   |
| rs3823355  | rs9357092  | 0.896 | 0.985 | 1340.42 | 0.97 | 1    | 42169   |
| rs3823355  | rs9366752  | 0.693 | 0.988 | 934.86  | 0.97 | 1    | 82594   |
| rs3823355  | rs4711209  | 0.897 | 0.988 | 1344.83 | 0.98 | 1    | 105320  |
| rs3823355  | rs6909253  | 0.45  | 0.872 | 553.09  | 0.85 | 0.9  | 113560  |
| rs3823355  | rs9261394  | 0.445 | 0.872 | 544.34  | 0.85 | 0.9  | 122479  |
| rs3823355  | rs9262582  | 0.061 | 0.52  | 55.76   | 0.46 | 0.58 | 1072222 |
| rs3823355  | rs9263607  | 0.054 | 0.435 | 49.51   | 0.38 | 0.49 | 1130074 |
| rs3823355  | rs17190526 | 0.057 | 0.447 | 52.71   | 0.39 | 0.5  | 1139998 |
| rs3823355  | rs9263823  | 0.061 | 0.508 | 57.2    | 0.45 | 0.56 | 1205011 |
| rs3823355  | rs7758128  | 0.008 | 0.305 | 7.14    | 0.21 | 0.4  | 2403199 |
| rs3823355  | rs3806156  | 0.01  | 0.123 | 9.48    | 0.08 | 0.16 | 2431614 |
| rs3823355  | rs2395185  | 0.004 | 0.065 | 3.25    | 0.03 | 0.1  | 2491083 |
| rs3823355  | rs2516049  | 0.004 | 0.063 | 3.2     | 0.03 | 0.1  | 2628316 |
| rs3823355  | rs532098   | 0.011 | 0.154 | 9.9     | 0.11 | 0.2  | 2635968 |
| rs3823355  | rs34518860 | 0.003 | 0.101 | 2.75    | 0.04 | 0.16 | 2652019 |
| rs6904029  | rs3823375  | 0.842 | 0.996 | 1250.36 | 0.98 | 1    | 1091    |
| rs6904029  | rs4947244  | 0.909 | 0.994 | 1380.75 | 0.98 | 1    | 11297   |
| rs6904029  | rs4959039  | 0.909 | 0.994 | 1380.76 | 0.98 | 1    | 14002   |
| rs6904029  | rs9357092  | 0.898 | 0.986 | 1346.52 | 0.97 | 1    | 41185   |
| rs6904029  | rs9366752  | 0.694 | 0.988 | 939.25  | 0.97 | 1    | 81610   |
| rs6904029  | rs4711209  | 0.899 | 0.989 | 1351.01 | 0.98 | 1    | 104336  |
| rs6904029  | rs6909253  | 0.453 | 0.873 | 557.31  | 0.85 | 0.9  | 112576  |
| rs6904029  | rs9261394  | 0.448 | 0.874 | 548.53  | 0.85 | 0.9  | 121495  |
| rs6904029  | rs9262582  | 0.061 | 0.52  | 55.69   | 0.46 | 0.58 | 1071238 |
| rs6904029  | rs9263607  | 0.054 | 0.435 | 49.42   | 0.38 | 0.49 | 1129090 |
| rs6904029  | rs17190526 | 0.056 | 0.444 | 51.78   | 0.39 | 0.5  | 1139014 |
| rs6904029  | rs9263823  | 0.061 | 0.508 | 57.12   | 0.45 | 0.56 | 1204027 |
| rs6904029  | rs7758128  | 0.008 | 0.308 | 7.32    | 0.21 | 0.4  | 2402215 |

|           |            |       |       |         |      |      |         |
|-----------|------------|-------|-------|---------|------|------|---------|
| rs6904029 | rs3806156  | 0.01  | 0.123 | 9.51    | 0.08 | 0.16 | 2430630 |
| rs6904029 | rs2395185  | 0.004 | 0.066 | 3.34    | 0.03 | 0.1  | 2490099 |
| rs6904029 | rs2516049  | 0.004 | 0.064 | 3.24    | 0.03 | 0.1  | 2627332 |
| rs6904029 | rs532098   | 0.011 | 0.153 | 9.81    | 0.11 | 0.2  | 2634984 |
| rs6904029 | rs34518860 | 0.003 | 0.099 | 2.65    | 0.04 | 0.16 | 2651035 |
| rs3823375 | rs4947244  | 0.784 | 0.995 | 1136.21 | 0.98 | 1    | 10206   |
| rs3823375 | rs4959039  | 0.785 | 0.995 | 1137.66 | 0.98 | 1    | 12911   |
| rs3823375 | rs9357092  | 0.776 | 0.987 | 1109.44 | 0.97 | 1    | 40094   |
| rs3823375 | rs9366752  | 0.599 | 0.988 | 798.54  | 0.97 | 1    | 80519   |
| rs3823375 | rs4711209  | 0.775 | 0.989 | 1109.95 | 0.98 | 1    | 103245  |
| rs3823375 | rs6909253  | 0.357 | 0.722 | 399.2   | 0.69 | 0.75 | 111485  |
| rs3823375 | rs9261394  | 0.35  | 0.719 | 389.3   | 0.69 | 0.75 | 120404  |
| rs3823375 | rs9262582  | 0.064 | 0.576 | 60.65   | 0.52 | 0.63 | 1070147 |
| rs3823375 | rs9263607  | 0.068 | 0.523 | 64.02   | 0.47 | 0.58 | 1127999 |
| rs3823375 | rs17190526 | 0.072 | 0.539 | 68.4    | 0.48 | 0.59 | 1137923 |
| rs3823375 | rs9263823  | 0.065 | 0.565 | 62.88   | 0.51 | 0.62 | 1202936 |
| rs3823375 | rs7758128  | 0.006 | 0.298 | 5.93    | 0.19 | 0.4  | 2401124 |
| rs3823375 | rs3806156  | 0.009 | 0.106 | 7.91    | 0.07 | 0.14 | 2429539 |
| rs3823375 | rs2395185  | 0.003 | 0.052 | 2.47    | 0.02 | 0.09 | 2489008 |
| rs3823375 | rs2516049  | 0.002 | 0.046 | 1.83    | 0.01 | 0.08 | 2626241 |
| rs3823375 | rs532098   | 0.009 | 0.126 | 7.62    | 0.08 | 0.17 | 2633893 |
| rs3823375 | rs34518860 | 0.003 | 0.108 | 2.73    | 0.05 | 0.17 | 2649944 |
| rs4947244 | rs4959039  | 0.999 | 0.999 | 1641.53 | 0.98 | 1    | 2705    |
| rs4947244 | rs9357092  | 0.988 | 0.996 | 1593.47 | 0.98 | 1    | 29888   |
| rs4947244 | rs9366752  | 0.764 | 0.993 | 1049.5  | 0.98 | 1    | 70313   |
| rs4947244 | rs4711209  | 0.989 | 0.995 | 1598.76 | 0.98 | 1    | 93039   |
| rs4947244 | rs6909253  | 0.526 | 0.982 | 721.63  | 0.97 | 0.99 | 101279  |
| rs4947244 | rs9261394  | 0.52  | 0.983 | 711.87  | 0.97 | 1    | 110198  |
| rs4947244 | rs9262582  | 0.061 | 0.499 | 54.2    | 0.44 | 0.55 | 1059941 |
| rs4947244 | rs9263607  | 0.056 | 0.424 | 49.89   | 0.37 | 0.48 | 1117793 |
| rs4947244 | rs17190526 | 0.058 | 0.432 | 52.3    | 0.38 | 0.48 | 1127717 |
| rs4947244 | rs9263823  | 0.062 | 0.49  | 56.22   | 0.43 | 0.54 | 1192730 |
| rs4947244 | rs7758128  | 0.006 | 0.258 | 5.67    | 0.16 | 0.35 | 2390918 |
| rs4947244 | rs3806156  | 0.007 | 0.103 | 6.21    | 0.06 | 0.14 | 2419333 |

|           |            |       |       |         |      |      |         |
|-----------|------------|-------|-------|---------|------|------|---------|
| rs4947244 | rs2395185  | 0.002 | 0.048 | 1.67    | 0.01 | 0.09 | 2478802 |
| rs4947244 | rs2516049  | 0.002 | 0.046 | 1.6     | 0.01 | 0.08 | 2616035 |
| rs4947244 | rs532098   | 0.008 | 0.133 | 6.88    | 0.08 | 0.18 | 2623687 |
| rs4947244 | rs34518860 | 0.003 | 0.097 | 2.71    | 0.04 | 0.15 | 2639738 |
| rs4959039 | rs9357092  | 0.988 | 0.996 | 1593.45 | 0.98 | 1    | 27183   |
| rs4959039 | rs9366752  | 0.764 | 0.993 | 1049.54 | 0.98 | 1    | 67608   |
| rs4959039 | rs4711209  | 0.989 | 0.995 | 1598.75 | 0.98 | 1    | 90334   |
| rs4959039 | rs6909253  | 0.525 | 0.982 | 720.83  | 0.97 | 0.99 | 98574   |
| rs4959039 | rs9261394  | 0.52  | 0.983 | 711.55  | 0.97 | 1    | 107493  |
| rs4959039 | rs9262582  | 0.06  | 0.497 | 53.68   | 0.44 | 0.55 | 1057236 |
| rs4959039 | rs9263607  | 0.055 | 0.421 | 49.17   | 0.37 | 0.47 | 1115088 |
| rs4959039 | rs17190526 | 0.057 | 0.429 | 51.56   | 0.38 | 0.48 | 1125012 |
| rs4959039 | rs9263823  | 0.061 | 0.488 | 55.7    | 0.43 | 0.54 | 1190025 |
| rs4959039 | rs7758128  | 0.006 | 0.261 | 5.79    | 0.17 | 0.35 | 2388213 |
| rs4959039 | rs3806156  | 0.007 | 0.103 | 6.24    | 0.06 | 0.14 | 2416628 |
| rs4959039 | rs2395185  | 0.002 | 0.047 | 1.61    | 0.01 | 0.09 | 2476097 |
| rs4959039 | rs2516049  | 0.002 | 0.046 | 1.57    | 0.01 | 0.08 | 2613330 |
| rs4959039 | rs532098   | 0.008 | 0.134 | 6.98    | 0.09 | 0.18 | 2620982 |
| rs4959039 | rs34518860 | 0.003 | 0.098 | 2.82    | 0.04 | 0.15 | 2637033 |
| rs9357092 | rs9366752  | 0.766 | 0.998 | 1064.36 | 0.98 | 1    | 40425   |
| rs9357092 | rs4711209  | 0.99  | 0.998 | 1605.11 | 0.98 | 1    | 63151   |
| rs9357092 | rs6909253  | 0.528 | 0.981 | 724.45  | 0.97 | 0.99 | 71391   |
| rs9357092 | rs9261394  | 0.522 | 0.982 | 714.61  | 0.97 | 0.99 | 80310   |
| rs9357092 | rs9262582  | 0.061 | 0.499 | 54.07   | 0.44 | 0.55 | 1030053 |
| rs9357092 | rs9263607  | 0.056 | 0.426 | 50.24   | 0.37 | 0.48 | 1087905 |
| rs9357092 | rs17190526 | 0.058 | 0.434 | 52.65   | 0.38 | 0.49 | 1097829 |
| rs9357092 | rs9263823  | 0.062 | 0.49  | 56.15   | 0.43 | 0.54 | 1162842 |
| rs9357092 | rs7758128  | 0.007 | 0.267 | 5.99    | 0.17 | 0.36 | 2361030 |
| rs9357092 | rs3806156  | 0.007 | 0.104 | 6.33    | 0.06 | 0.14 | 2389445 |
| rs9357092 | rs2395185  | 0.001 | 0.043 | 1.35    | 0.01 | 0.08 | 2448914 |
| rs9357092 | rs2516049  | 0.001 | 0.042 | 1.33    | 0    | 0.08 | 2586147 |
| rs9357092 | rs532098   | 0.008 | 0.133 | 6.89    | 0.08 | 0.18 | 2593799 |
| rs9357092 | rs34518860 | 0.004 | 0.104 | 3.14    | 0.05 | 0.16 | 2609850 |
| rs9366752 | rs4711209  | 0.766 | 0.995 | 1056.37 | 0.98 | 1    | 22726   |



|           |            |       |       |         |       |      |         |
|-----------|------------|-------|-------|---------|-------|------|---------|
| rs9366752 | rs6909253  | 0.405 | 0.98  | 537.57  | 0.96  | 0.99 | 30966   |
| rs9366752 | rs9261394  | 0.401 | 0.981 | 531.04  | 0.96  | 1    | 39885   |
| rs9366752 | rs9262582  | 0     | 0.019 | 0.1     | -0.01 | 0.08 | 989628  |
| rs9366752 | rs9263607  | 0.001 | 0.041 | 0.6     | 0     | 0.09 | 1047480 |
| rs9366752 | rs17190526 | 0.001 | 0.044 | 0.7     | 0     | 0.1  | 1057404 |
| rs9366752 | rs9263823  | 0.001 | 0.039 | 0.47    | -0.01 | 0.09 | 1122417 |
| rs9366752 | rs7758128  | 0.008 | 0.258 | 6.99    | 0.17  | 0.34 | 2320605 |
| rs9366752 | rs3806156  | 0.001 | 0.052 | 1.24    | 0.01  | 0.1  | 2349020 |
| rs9366752 | rs2395185  | 0.001 | 0.051 | 0.47    | 0     | 0.12 | 2408489 |
| rs9366752 | rs2516049  | 0.001 | 0.061 | 0.62    | 0     | 0.13 | 2545722 |
| rs9366752 | rs532098   | 0.002 | 0.081 | 1.96    | 0.03  | 0.13 | 2553374 |
| rs9366752 | rs34518860 | 0.008 | 0.138 | 6.85    | 0.09  | 0.19 | 2569425 |
| rs4711209 | rs6909253  | 0.533 | 0.989 | 741.46  | 0.97  | 1    | 8240    |
| rs4711209 | rs9261394  | 0.527 | 0.99  | 731.81  | 0.98  | 1    | 17159   |
| rs4711209 | rs9262582  | 0.061 | 0.501 | 54.78   | 0.44  | 0.56 | 966902  |
| rs4711209 | rs9263607  | 0.057 | 0.426 | 50.6    | 0.37  | 0.48 | 1024754 |
| rs4711209 | rs17190526 | 0.059 | 0.436 | 53.45   | 0.38  | 0.49 | 1034678 |
| rs4711209 | rs9263823  | 0.062 | 0.491 | 56.89   | 0.43  | 0.55 | 1099691 |
| rs4711209 | rs7758128  | 0.006 | 0.254 | 5.5     | 0.16  | 0.35 | 2297879 |
| rs4711209 | rs3806156  | 0.007 | 0.102 | 6.19    | 0.06  | 0.14 | 2326294 |
| rs4711209 | rs2395185  | 0.001 | 0.043 | 1.34    | 0.01  | 0.08 | 2385763 |
| rs4711209 | rs2516049  | 0.001 | 0.042 | 1.3     | 0     | 0.08 | 2522996 |
| rs4711209 | rs532098   | 0.007 | 0.132 | 6.74    | 0.08  | 0.18 | 2530648 |
| rs4711209 | rs34518860 | 0.004 | 0.103 | 3.09    | 0.05  | 0.16 | 2546699 |
| rs6909253 | rs9261394  | 0.98  | 0.996 | 1716.18 | 0.98  | 1    | 8919    |
| rs6909253 | rs9262582  | 0.027 | 0.448 | 24.45   | 0.37  | 0.52 | 958662  |
| rs6909253 | rs9263607  | 0.022 | 0.364 | 20.5    | 0.29  | 0.43 | 1016514 |
| rs6909253 | rs17190526 | 0.022 | 0.362 | 20.61   | 0.29  | 0.43 | 1026438 |
| rs6909253 | rs9263823  | 0.029 | 0.454 | 27.04   | 0.38  | 0.52 | 1091451 |
| rs6909253 | rs7758128  | 0.005 | 0.322 | 5.22    | 0.2   | 0.43 | 2289639 |
| rs6909253 | rs3806156  | 0.001 | 0.025 | 0.5     | -0.01 | 0.06 | 2318054 |
| rs6909253 | rs2395185  | 0     | 0.016 | 0.17    | -0.01 | 0.06 | 2377523 |
| rs6909253 | rs2516049  | 0     | 0.004 | 0.01    | -0.01 | 0.05 | 2514756 |
| rs6909253 | rs532098   | 0.003 | 0.061 | 2.65    | 0.02  | 0.1  | 2522408 |

|            |            |       |       |        |       |      |         |
|------------|------------|-------|-------|--------|-------|------|---------|
| rs6909253  | rs34518860 | 0.004 | 0.152 | 3.86   | 0.08  | 0.22 | 2538459 |
| rs9261394  | rs9262582  | 0.027 | 0.451 | 24.28  | 0.38  | 0.52 | 949743  |
| rs9261394  | rs9263607  | 0.022 | 0.363 | 20.06  | 0.29  | 0.43 | 1007595 |
| rs9261394  | rs17190526 | 0.022 | 0.361 | 20.02  | 0.29  | 0.43 | 1017519 |
| rs9261394  | rs9263823  | 0.029 | 0.456 | 26.8   | 0.38  | 0.52 | 1082532 |
| rs9261394  | rs7758128  | 0.005 | 0.323 | 5.19   | 0.21  | 0.43 | 2280720 |
| rs9261394  | rs3806156  | 0     | 0.023 | 0.4    | -0.01 | 0.06 | 2309135 |
| rs9261394  | rs2395185  | 0     | 0.013 | 0.11   | -0.01 | 0.06 | 2368604 |
| rs9261394  | rs2516049  | 0     | 0.001 | 0      | -0.01 | 0.05 | 2505837 |
| rs9261394  | rs532098   | 0.003 | 0.058 | 2.39   | 0.02  | 0.1  | 2513489 |
| rs9261394  | rs34518860 | 0.004 | 0.154 | 3.86   | 0.08  | 0.22 | 2529540 |
| rs9262582  | rs9263607  | 0.754 | 0.998 | 657.08 | 0.98  | 1    | 57852   |
| rs9262582  | rs17190526 | 0.777 | 0.994 | 684.8  | 0.98  | 1    | 67776   |
| rs9262582  | rs9263823  | 0.884 | 0.966 | 745.65 | 0.95  | 0.98 | 132789  |
| rs9262582  | rs7758128  | 0.002 | 0.073 | 1.64   | 0.02  | 0.13 | 1330977 |
| rs9262582  | rs3806156  | 0.021 | 0.364 | 17.26  | 0.29  | 0.43 | 1359392 |
| rs9262582  | rs2395185  | 0.015 | 0.282 | 13.11  | 0.21  | 0.35 | 1418861 |
| rs9262582  | rs2516049  | 0.023 | 0.341 | 19.65  | 0.27  | 0.41 | 1556094 |
| rs9262582  | rs532098   | 0.015 | 0.381 | 13.27  | 0.29  | 0.46 | 1563746 |
| rs9262582  | rs34518860 | 0     | 0.134 | 0.27   | 0.01  | 0.33 | 1579797 |
| rs9263607  | rs17190526 | 0.887 | 0.957 | 822.58 | 0.94  | 0.97 | 9924    |
| rs9263607  | rs9263823  | 0.737 | 0.962 | 628.91 | 0.94  | 0.98 | 74937   |
| rs9263607  | rs7758128  | 0.004 | 0.122 | 3.52   | 0.06  | 0.19 | 1273125 |
| rs9263607  | rs3806156  | 0.038 | 0.436 | 32.76  | 0.37  | 0.5  | 1301540 |
| rs9263607  | rs2395185  | 0.018 | 0.27  | 15.36  | 0.21  | 0.33 | 1361009 |
| rs9263607  | rs2516049  | 0.027 | 0.327 | 23.15  | 0.27  | 0.39 | 1498242 |
| rs9263607  | rs532098   | 0.02  | 0.392 | 18.26  | 0.31  | 0.46 | 1505894 |
| rs9263607  | rs34518860 | 0     | 0.001 | 0      | -0.01 | 0.04 | 1521945 |
| rs17190526 | rs9263823  | 0.77  | 0.963 | 671.64 | 0.94  | 0.98 | 65013   |
| rs17190526 | rs7758128  | 0.004 | 0.12  | 3.43   | 0.06  | 0.19 | 1263201 |
| rs17190526 | rs3806156  | 0.028 | 0.376 | 24.44  | 0.31  | 0.44 | 1291616 |
| rs17190526 | rs2395185  | 0.017 | 0.267 | 15.33  | 0.21  | 0.33 | 1351085 |
| rs17190526 | rs2516049  | 0.027 | 0.327 | 23.7   | 0.27  | 0.39 | 1488318 |
| rs17190526 | rs532098   | 0.025 | 0.433 | 22.79  | 0.36  | 0.5  | 1495970 |

|            |            |       |       |         |       |      |         |
|------------|------------|-------|-------|---------|-------|------|---------|
| rs17190526 | rs34518860 | 0     | 0.017 | 0.24    | -0.01 | 0.06 | 1512021 |
| rs9263823  | rs7758128  | 0.005 | 0.115 | 3.96    | 0.06  | 0.18 | 1198188 |
| rs9263823  | rs3806156  | 0.022 | 0.368 | 19.25   | 0.3   | 0.44 | 1226603 |
| rs9263823  | rs2395185  | 0.013 | 0.25  | 11.02   | 0.18  | 0.32 | 1286072 |
| rs9263823  | rs2516049  | 0.02  | 0.306 | 16.82   | 0.24  | 0.37 | 1423305 |
| rs9263823  | rs532098   | 0.016 | 0.38  | 13.95   | 0.29  | 0.46 | 1430957 |
| rs9263823  | rs34518860 | 0     | 0.028 | 0.01    | -0.01 | 0.25 | 1447008 |
| rs7758128  | rs3806156  | 0.059 | 1     | 72.17   | 0.97  | 1    | 28415   |
| rs7758128  | rs2395185  | 0.018 | 0.887 | 19.27   | 0.76  | 0.95 | 87884   |
| rs7758128  | rs2516049  | 0.017 | 0.875 | 17.26   | 0.74  | 0.94 | 225117  |
| rs7758128  | rs532098   | 0.028 | 0.844 | 32.48   | 0.75  | 0.91 | 232769  |
| rs7758128  | rs34518860 | 0.188 | 0.827 | 135.56  | 0.77  | 0.87 | 248820  |
| rs3806156  | rs2395185  | 0.337 | 0.645 | 363.95  | 0.62  | 0.67 | 59469   |
| rs3806156  | rs2516049  | 0.409 | 0.723 | 460.78  | 0.7   | 0.75 | 196702  |
| rs3806156  | rs532098   | 0.446 | 0.815 | 534.9   | 0.79  | 0.84 | 204354  |
| rs3806156  | rs34518860 | 0     | 0.004 | 0       | -0.01 | 0.08 | 220405  |
| rs2395185  | rs2516049  | 0.867 | 0.95  | 1286.72 | 0.93  | 0.96 | 137233  |
| rs2395185  | rs532098   | 0.426 | 0.884 | 529.66  | 0.86  | 0.91 | 144885  |
| rs2395185  | rs34518860 | 0.085 | 1     | 108.3   | 0.98  | 1    | 160936  |
| rs2516049  | rs532098   | 0.525 | 1     | 760.31  | 0.99  | 1    | 7652    |
| rs2516049  | rs34518860 | 0.081 | 1     | 102.71  | 0.98  | 1    | 23703   |
| rs532098   | rs34518860 | 0.144 | 1     | 187.94  | 0.99  | 1    | 16051   |

**Notes:**

Locus 1 and Locus 2 are the two loci under comparison

$r^2$  is the correlation coefficient between the two loci

$D'$  is the value of D prime between the two loci

$\text{lod}$  is the log of the likelihood odds ratio, a measure of confidence in the value of  $D'$

$CI_{\text{lower}}$  is 95% confidence lower bound on  $D'$

$CI_{\text{upper}}$  is the 95% confidence upper bound on  $D'$

Distance is bp separating the two loci

**SUPPLEMENTARY APPENDIX TABLE 3.** Second locus effect tests of strongly-associated HLA region SNPs in a forward stepwise-regression procedure for the vitiligo phenotype, based on data from the genomewide association study

| Null Model | Alternative Model | P <sub>logit</sub> | Null Model | Alternative Model | P <sub>logit</sub> | Null Model | Alternative Model | P <sub>logit</sub> | Null Model | Alternative Model | P <sub>logit</sub> |
|------------|-------------------|--------------------|------------|-------------------|--------------------|------------|-------------------|--------------------|------------|-------------------|--------------------|
| F          | F+A               | NS                 | A          | A+F               | 1.75E-5            | U          | U+A               | 5.59E-13           | A          | A+U               | 1.14E-27           |
| F          | F+B               | NS                 | B          | B+F               | 1.87E-8            | U          | U+B               | 1.92E-9            | B          | B+U               | 4.07E-27           |
| F          | F+C               | NS                 | C          | C+F               | 2.22E-4            | U          | U+C               | 3.14E-14           | C          | C+U               | 1.52E-27           |
| F          | F+D               | NS                 | D          | D+F               | 2.57E-8            | U          | U+D               | 3.94E-9            | D          | D+U               | 8.99E-27           |
| F          | F+E               | NS                 | E          | E+F               | 4.42E-9            | U          | U+E               | 3.36E-10           | E          | E+U               | 4.90E-28           |
| ...        | F                 | 1.78E-20           | ...        | ...               | ...                | U          | U+F               | 3.55E-16           | F          | F+U               | 2.56E-26           |
| F          | F+G               | NS                 | G          | G+F               | NS                 | U          | U+G               | 4.38E-16           | G          | G+U               | 7.13E-27           |
| F          | F+H               | NS                 | H          | H+F               | 5.95E-2            | U          | U+H               | 1.40E-15           | H          | H+U               | 7.24E-27           |
| F          | F+I               | NS                 | I          | I+F               | 5.21E-6            | U          | U+I               | 7.36E-13           | I          | I+U               | 3.05E-28           |
| F          | F+J               | NS                 | J          | J+F               | 2.42E-5            | U          | U+J               | 1.78E-13           | J          | J+U               | 7.28E-28           |
| F          | F+K               | NS                 | K          | K+F               | 4.18E-6            | U          | U+K               | 3.03E-13           | K          | K+U               | 9.08E-28           |
| F          | F+L               | NS                 | L          | L+F               | 1.42E-4            | U          | U+L               | 4.33E-14           | L          | L+U               | 1.02E-27           |
| F          | F+M               | NS                 | M          | M+F               | 1.81E-8            | U          | U+M               | 4.18E-12           | M          | M+U               | 2.36E-29           |
| F          | F+N               | NS                 | N          | N+F               | 9.77E-5            | U          | U+N               | 5.26E-14           | N          | N+U               | 9.22E-28           |
| F          | F+O               | NS                 | O          | O+F               | 3.83E-8            | U          | U+O               | 9.37E-13           | O          | O+U               | 4.55E-29           |
| F          | F+P               | NS                 | P          | P+F               | 8.42E-8            | U          | U+P               | 3.06E-13           | P          | P+U               | 3.08E-29           |
| F          | F+Q               | 2.07E-12           | Q          | Q+F               | 8.98E-18           | U          | U+Q               | 8.91E-9            | Q          | Q+U               | 4.21E-25           |
| F          | F+R               | 1.13E-15           | R          | R+F               | 5.09E-17           | U          | U+R               | NS                 | R          | R+U               | 9.49E-15           |

|   |     |          |   |     |          |     |     |          |     |     |          |
|---|-----|----------|---|-----|----------|-----|-----|----------|-----|-----|----------|
| F | F+S | 7.26E-12 | S | S+F | 1.16E-18 | U   | U+S | NS       | S   | S+U | 5.30E-20 |
| F | F+T | 1.03E-13 | T | T+F | 1.25E-18 | U   | U+T | NS       | T   | T+U | 6.98E-18 |
| F | F+U | 2.26E-26 | U | U+F | 3.55E-16 | ... | U   | 4.10E-31 | ... | ... | ...      |
| F | F+V | 9.75E-14 | V | V+F | 3.33E-19 | U   | U+V | 1.41E-4  | V   | V+U | 5.43E-21 |

---

A, rs2975033; B, rs2517715; C, rs3903160; D, rs6457110; E, rs13893464; F, rs12206499; G, rs3823355; H, rs6904029; I, rs3823375; J, rs4947244; K, rs4959039; L, rs9357092; M, rs9366752; N, rs4711209; O, rs6906253; P, rs9261394; Q, rs7758128; R, rs3806156; S, rs2395185; T, rs2516049; U, rs532098; V, rs34518860  $P_{\text{logit}}$ ,  $P$  values from logistic regression analyses. NS, not significant ( $P > 0.05$ ). A multiplicative genetic model for the high risk allele of each locus was assumed.

**SUPPLEMENTARY APPENDIX TABLE 4A.** Allelic association analyses of most significant SNPs comparing generalized vitiligo patients with concomitant other autoimmune diseases versus controls (genomewide association study data)

| <u>CHR</u> | <u>SNP</u> | <u>Position (nt)</u> | <u>A1</u> | <u>F A</u> | <u>F U</u> | <u>A2</u> | <u>trend P</u> | <u>OR</u> | <u>L95</u> | <u>U95</u> |
|------------|------------|----------------------|-----------|------------|------------|-----------|----------------|-----------|------------|------------|
| 1          | rs301819   | 8424373              | A         | 0.49       | 0.41       | G         | 5.84E-05       | 1.35      | 1.17       | 1.56       |
| 1          | rs4908760  | 8448729              | G         | 0.43       | 0.37       | A         | 4.60E-04       | 1.30      | 1.12       | 1.51       |
| 1          | rs11121194 | 8492493              | C         | 0.43       | 0.37       | T         | 5.77E-04       | 1.29      | 1.12       | 1.50       |
| 1          | rs2476601  | 114179091            | A         | 0.17       | 0.09       | G         | 7.37E-12       | 2.01      | 1.64       | 2.46       |
| 3          | rs13076312 | 189571948            | T         | 0.53       | 0.44       | C         | 9.92E-07       | 1.43      | 1.24       | 1.65       |
| 3          | rs1464510  | 189595248            | T         | 0.54       | 0.44       | G         | 1.37E-07       | 1.47      | 1.27       | 1.70       |
| 3          | rs13091753 | 189597283            | T         | 0.49       | 0.40       | G         | 3.61E-07       | 1.45      | 1.25       | 1.67       |
| 3          | rs1559810  | 189607048            | T         | 0.49       | 0.40       | G         | 4.37E-07       | 1.44      | 1.25       | 1.67       |
| 6          | rs2975033  | 29930240             | T         | 0.36       | 0.29       | C         | 1.29E-04       | 1.34      | 1.15       | 1.56       |
| 6          | rs2517715  | 30025418             | G         | 0.41       | 0.34       | A         | 1.55E-04       | 1.33      | 1.15       | 1.54       |
| 6          | rs3903160  | 30040876             | T         | 0.35       | 0.29       | C         | 1.38E-04       | 1.34      | 1.15       | 1.56       |
| 6          | rs6457110  | 30041860             | A         | 0.45       | 0.40       | T         | 7.34E-03       | 1.22      | 1.06       | 1.41       |
| 6          | rs3893464  | 30043229             | C         | 0.59       | 0.54       | T         | 2.01E-03       | 1.26      | 1.09       | 1.46       |
| 6          | rs12206499 | 30045106             | G         | 0.36       | 0.29       | A         | 4.50E-05       | 1.37      | 1.18       | 1.59       |
| 6          | rs3823355  | 30050062             | T         | 0.36       | 0.29       | C         | 4.42E-05       | 1.37      | 1.18       | 1.60       |
| 6          | rs6904029  | 30051046             | A         | 0.36       | 0.29       | G         | 7.60E-05       | 1.36      | 1.17       | 1.58       |
| 6          | rs3823375  | 30052137             | C         | 0.38       | 0.33       | T         | 9.46E-04       | 1.29      | 1.11       | 1.49       |
| 6          | rs4947244  | 30062343             | G         | 0.33       | 0.28       | C         | 3.87E-04       | 1.32      | 1.13       | 1.54       |
| 6          | rs4959039  | 30065048             | G         | 0.33       | 0.28       | A         | 4.19E-04       | 1.32      | 1.13       | 1.53       |
| 6          | rs9357092  | 30092231             | A         | 0.34       | 0.28       | G         | 3.00E-04       | 1.33      | 1.14       | 1.55       |
| 6          | rs9366752  | 30132656             | T         | 0.27       | 0.23       | C         | 3.46E-03       | 1.27      | 1.08       | 1.49       |
| 6          | rs4711209  | 30155382             | A         | 0.33       | 0.28       | G         | 3.06E-04       | 1.33      | 1.14       | 1.55       |
| 6          | rs6909253  | 30163622             | G         | 0.49       | 0.42       | T         | 1.31E-04       | 1.32      | 1.15       | 1.53       |
| 6          | rs9261394  | 30172541             | A         | 0.49       | 0.42       | G         | 1.50E-04       | 1.32      | 1.14       | 1.52       |
| 6          | rs7758128  | 32453261             | A         | 0.05       | 0.03       | C         | 1.01E-03       | 1.80      | 1.26       | 2.57       |
| 6          | rs3806156  | 32481676             | T         | 0.47       | 0.37       | G         | 6.28E-08       | 1.50      | 1.30       | 1.74       |
| 6          | rs2395185  | 32541145             | T         | 0.43       | 0.33       | G         | 5.20E-08       | 1.50      | 1.30       | 1.74       |
| 6          | rs2516049  | 32678378             | G         | 0.42       | 0.32       | A         | 2.02E-09       | 1.57      | 1.35       | 1.82       |

| <u>CHR</u> | <u>SNP</u> | <u>Position (nt)</u> | <u>A1</u> | <u>F_A</u> | <u>F_U</u> | <u>A2</u> | <u>trend P</u> | <u>OR</u> | <u>L95</u> | <u>U95</u> |
|------------|------------|----------------------|-----------|------------|------------|-----------|----------------|-----------|------------|------------|
| 6          | rs532098   | 32686030             | T         | 0.58       | 0.46       | C         | 1.90E-10       | 1.61      | 1.39       | 1.86       |
| 6          | rs34518860 | 32702081             | A         | 0.14       | 0.11       | G         | 9.98E-03       | 1.32      | 1.07       | 1.64       |
| 10         | rs706779   | 6138830              | A         | 0.60       | 0.53       | G         | 5.24E-04       | 1.30      | 1.12       | 1.50       |
| 10         | rs7090530  | 6150881              | A         | 0.66       | 0.60       | C         | 3.40E-04       | 1.32      | 1.13       | 1.53       |
| 10         | rs12251307 | 6163501              | C         | 0.92       | 0.87       | T         | 4.71E-05       | 1.70      | 1.31       | 2.20       |
| 10         | rs4750005  | 6209691              | T         | 0.58       | 0.52       | C         | 5.30E-04       | 1.29      | 1.12       | 1.49       |
| 10         | rs3920615  | 6216786              | A         | 0.62       | 0.55       | G         | 1.05E-04       | 1.33      | 1.15       | 1.54       |
| 10         | rs4747887  | 6217688              | T         | 0.62       | 0.55       | C         | 1.07E-04       | 1.33      | 1.15       | 1.54       |
| 10         | rs4750012  | 6217800              | C         | 0.62       | 0.55       | T         | 1.10E-04       | 1.33      | 1.15       | 1.54       |
| 10         | rs7099083  | 6218242              | G         | 0.62       | 0.55       | A         | 8.84E-05       | 1.34      | 1.16       | 1.55       |
| 11         | rs10830236 | 88540464             | C         | 0.73       | 0.67       | T         | 9.74E-05       | 1.38      | 1.17       | 1.62       |
| 11         | rs11018528 | 88570025             | A         | 0.77       | 0.71       | G         | 2.82E-05       | 1.44      | 1.21       | 1.71       |
| 11         | rs10765198 | 88609422             | T         | 0.78       | 0.71       | C         | 1.64E-05       | 1.46      | 1.23       | 1.74       |
| 11         | rs1847134  | 88644901             | A         | 0.77       | 0.68       | C         | 2.78E-07       | 1.55      | 1.31       | 1.84       |
| 11         | rs1393350  | 88650694             | G         | 0.83       | 0.73       | A         | 1.06E-09       | 1.79      | 1.48       | 2.16       |
| 11         | rs1806319  | 88677584             | A         | 0.71       | 0.63       | G         | 2.37E-05       | 1.40      | 1.20       | 1.63       |
| 14         | rs8192917  | 24172000             | G         | 0.28       | 0.23       | A         | 6.76E-03       | 1.25      | 1.06       | 1.47       |
| 14         | rs2273844  | 24173254             | A         | 0.28       | 0.23       | G         | 7.56E-03       | 1.25      | 1.06       | 1.47       |
| 21         | rs11203203 | 42709255             | A         | 0.42       | 0.37       | G         | 2.90E-03       | 1.25      | 1.08       | 1.45       |
| 21         | rs2839511  | 42721590             | A         | 0.29       | 0.23       | G         | 2.48E-05       | 1.41      | 1.20       | 1.66       |
| 22         | rs229527   | 35911431             | T         | 0.48       | 0.42       | G         | 1.06E-03       | 1.27      | 1.10       | 1.47       |
| 22         | rs5756546  | 35919751             | T         | 0.28       | 0.22       | C         | 1.12E-04       | 1.38      | 1.17       | 1.62       |

**SUPPLEMENTARY APPENDIX TABLE 4B.** Allelic association analyses of most significant SNPs comparing generalized vitiligo patients without concomitant other autoimmune diseases versus controls (genomewide association study data)

| <u>CHR</u> | <u>SNP</u> | <u>Position (bp)</u> | <u>A1</u> | <u>F_A</u> | <u>F_U</u> | <u>A2</u> | <u>trend P</u> | <u>OR</u> | <u>L95</u> | <u>U95</u> |
|------------|------------|----------------------|-----------|------------|------------|-----------|----------------|-----------|------------|------------|
| 1          | rs301819   | 8424373              | A         | 0.48       | 0.4143     | G         | 5.62E-07       | 1.313     | 1.18       | 1.462      |
| 1          | rs4908760  | 8448729              | G         | 0.429      | 0.3711     | A         | 1.02E-05       | 1.269     | 1.141      | 1.411      |
| 1          | rs11121194 | 8492493              | C         | 0.4311     | 0.3721     | T         | 7.21E-06       | 1.274     | 1.146      | 1.417      |
| 1          | rs2476601  | 114179091            | A         | 0.1193     | 0.09216    | G         | 0.0006785      | 1.336     | 1.13       | 1.58       |
| 3          | rs13076312 | 189571948            | T         | 0.4989     | 0.4446     | C         | 4.82E-05       | 1.243     | 1.119      | 1.381      |

| <u>CHR</u> | <u>SNP</u> | <u>Position (nt)</u> | <u>A1</u> | <u>F_A</u> | <u>F_U</u> | <u>A2</u> | <u>trend P</u> | <u>OR</u> | <u>L95</u> | <u>U95</u> |
|------------|------------|----------------------|-----------|------------|------------|-----------|----------------|-----------|------------|------------|
| 3          | rs1464510  | 189595248            | T         | 0.4958     | 0.4392     | G         | 2.23E-05       | 1.255     | 1.13       | 1.395      |
| 3          | rs13091753 | 189597283            | T         | 0.4436     | 0.4011     | G         | 0.001396       | 1.187     | 1.068      | 1.319      |
| 3          | rs1559810  | 189607048            | T         | 0.4427     | 0.3997     | G         | 0.001205       | 1.19      | 1.071      | 1.322      |
| 6          | rs2975033  | 29930240             | T         | 0.3943     | 0.2909     | C         | 4.28E-16       | 1.564     | 1.403      | 1.744      |
| 6          | rs2517715  | 30025418             | G         | 0.429      | 0.3394     | A         | 7.24E-12       | 1.448     | 1.302      | 1.611      |
| 6          | rs3903160  | 30040876             | T         | 0.3947     | 0.2872     | C         | 1.45E-17       | 1.606     | 1.439      | 1.793      |
| 6          | rs6457110  | 30041860             | A         | 0.5011     | 0.3987     | T         | 2.09E-14       | 1.505     | 1.354      | 1.673      |
| 6          | rs3893464  | 30043229             | C         | 0.6351     | 0.5383     | T         | 4.26E-13       | 1.49      | 1.337      | 1.661      |
| 6          | rs12206499 | 30045106             | G         | 0.4103     | 0.2911     | A         | 7.05E-21       | 1.679     | 1.504      | 1.873      |
| 6          | rs3823355  | 30050062             | T         | 0.4069     | 0.2894     | C         | 1.55E-20       | 1.672     | 1.498      | 1.866      |
| 6          | rs6904029  | 30051046             | A         | 0.4064     | 0.2903     | G         | 4.77E-20       | 1.661     | 1.488      | 1.853      |
| 6          | rs3823375  | 30052137             | C         | 0.4332     | 0.3258     | T         | 1.04E-16       | 1.579     | 1.416      | 1.76       |
| 6          | rs4947244  | 30062343             | G         | 0.3801     | 0.2758     | C         | 7.10E-17       | 1.593     | 1.427      | 1.78       |
| 6          | rs4959039  | 30065048             | G         | 0.3796     | 0.2761     | A         | 1.30E-16       | 1.587     | 1.421      | 1.772      |
| 6          | rs9357092  | 30092231             | A         | 0.3828     | 0.276      | G         | 1.31E-17       | 1.61      | 1.442      | 1.798      |
| 6          | rs9366752  | 30132656             | T         | 0.3181     | 0.2288     | C         | 3.54E-14       | 1.558     | 1.388      | 1.749      |
| 6          | rs4711209  | 30155382             | A         | 0.3812     | 0.275      | G         | 1.91E-17       | 1.607     | 1.439      | 1.795      |
| 6          | rs6909253  | 30163622             | G         | 0.5137     | 0.4175     | T         | 6.95E-13       | 1.469     | 1.322      | 1.632      |
| 6          | rs9261394  | 30172541             | A         | 0.5189     | 0.4204     | G         | 1.87E-13       | 1.484     | 1.335      | 1.65       |
| 6          | rs7758128  | 32453261             | A         | 0.0694     | 0.02683    | C         | 5.40E-17       | 2.777     | 2.167      | 3.56       |
| 6          | rs3806156  | 32481676             | T         | 0.479      | 0.3749     | G         | 2.20E-15       | 1.538     | 1.382      | 1.712      |
| 6          | rs2395185  | 32541145             | T         | 0.4106     | 0.332      | G         | 1.18E-09       | 1.395     | 1.252      | 1.553      |
| 6          | rs2516049  | 32678378             | G         | 0.4041     | 0.321      | A         | 8.29E-11       | 1.431     | 1.283      | 1.595      |
| 6          | rs532098   | 32686030             | T         | 0.6084     | 0.461      | C         | 1.08E-27       | 1.813     | 1.627      | 2.021      |
| 6          | rs34518860 | 32702081             | A         | 0.1872     | 0.1076     | G         | 1.81E-18       | 1.892     | 1.636      | 2.188      |
| 10         | rs706779   | 6138830              | A         | 0.6109     | 0.5347     | G         | 9.17E-09       | 1.371     | 1.23       | 1.527      |
| 10         | rs7090530  | 6150881              | A         | 0.6725     | 0.5991     | C         | 2.25E-08       | 1.368     | 1.225      | 1.527      |
| 10         | rs12251307 | 6163501              | C         | 0.9106     | 0.8701     | T         | 2.63E-06       | 1.529     | 1.279      | 1.827      |
| 10         | rs4750005  | 6209691              | T         | 0.5904     | 0.5205     | C         | 1.88E-07       | 1.325     | 1.192      | 1.474      |
| 10         | rs3920615  | 6216786              | A         | 0.6158     | 0.5451     | G         | 1.20E-07       | 1.334     | 1.199      | 1.485      |
| 10         | rs4747887  | 6217688              | T         | 0.6157     | 0.5452     | C         | 1.31E-07       | 1.333     | 1.198      | 1.484      |
| 10         | rs4750012  | 6217800              | C         | 0.6157     | 0.5453     | T         | 1.35E-07       | 1.333     | 1.197      | 1.483      |
| 10         | rs7099083  | 6218242              | G         | 0.6157     | 0.5455     | A         | 1.49E-07       | 1.331     | 1.196      | 1.482      |



| <u>CHR</u> | <u>SNP</u> | <u>Position (nt)</u> | <u>A1</u> | <u>F_A</u> | <u>F_U</u> | <u>A2</u> | <u>trend P</u> | <u>OR</u> | <u>L95</u> | <u>U95</u> |
|------------|------------|----------------------|-----------|------------|------------|-----------|----------------|-----------|------------|------------|
| 11         | rs10830236 | 88540464             | C         | 0.715      | 0.6676     | T         | 0.0001403      | 1.251     | 1.114      | 1.403      |
| 11         | rs11018528 | 88570025             | A         | 0.7597     | 0.7056     | G         | 5.81E-06       | 1.325     | 1.173      | 1.496      |
| 11         | rs10765198 | 88609422             | T         | 0.7655     | 0.7136     | C         | 1.20E-05       | 1.314     | 1.163      | 1.486      |
| 11         | rs1847134  | 88644901             | A         | 0.7461     | 0.6845     | C         | 4.81E-07       | 1.357     | 1.205      | 1.529      |
| 11         | rs1393350  | 88650694             | G         | 0.796      | 0.7319     | A         | 2.73E-08       | 1.438     | 1.264      | 1.635      |
| 11         | rs1806319  | 88677584             | A         | 0.6861     | 0.63       | G         | 1.55E-05       | 1.277     | 1.142      | 1.426      |
| 14         | rs8192917  | 24172000             | G         | 0.2829     | 0.2347     | A         | 2.89E-05       | 1.289     | 1.144      | 1.452      |
| 14         | rs2273844  | 24173254             | A         | 0.2808     | 0.2341     | G         | 4.95E-05       | 1.28      | 1.136      | 1.442      |
| 21         | rs11203203 | 42709255             | A         | 0.4363     | 0.3727     | G         | 9.67E-07       | 1.308     | 1.174      | 1.456      |
| 21         | rs2839511  | 42721590             | A         | 0.2813     | 0.2254     | G         | 1.17E-06       | 1.341     | 1.191      | 1.511      |
| 22         | rs229527   | 35911431             | T         | 0.4947     | 0.4186     | G         | 1.08E-08       | 1.359     | 1.223      | 1.511      |
| 22         | rs5756546  | 35919751             | T         | 0.2676     | 0.2202     | C         | 2.75E-05       | 1.295     | 1.147      | 1.462      |

**SUPPLEMENTARY APPENDIX TABLE 4C.** Allelic association analyses of most significant SNPs comparing generalized vitiligo patients with concomitant other autoimmune diseases versus controls (replication set 1 data)

| <u>CHR</u> | <u>SNP</u> | <u>Position (bp)</u> | <u>A1</u> | <u>F_A</u> | <u>F_U</u> | <u>A2</u> | <u>TREND P</u> | <u>OR</u> | <u>L95</u> | <u>U95</u> |
|------------|------------|----------------------|-----------|------------|------------|-----------|----------------|-----------|------------|------------|
| 1          | rs301819   | 8424373              | A         | 0.5512     | 0.4396     | G         | 0.0009119      | 1.546     | 1.193      | 2.004      |
| 1          | rs4908760  | 8448729              | G         | 0.5        | 0.3842     | A         | 0.0004447      | 1.586     | 1.223      | 2.056      |
| 1          | rs11121194 | 8492493              | C         | 0.5039     | 0.3906     | T         | 0.0005728      | 1.57      | 1.212      | 2.033      |
| 1          | rs2476601  | 114179091            | A         | 0.1523     | 0.09034    | G         | 0.001753       | 1.791     | 1.236      | 2.595      |
| 3          | rs13076312 | 189571948            | T         | 0.543      | 0.4433     | C         | 0.002052       | 1.52      | 1.163      | 1.986      |
| 3          | rs1464510  | 189595248            | T         | 0.5273     | 0.4408     | G         | 0.00746        | 1.436     | 1.1        | 1.875      |
| 3          | rs13091753 | 189597283            | T         | 0.4878     | 0.4079     | G         | 0.0124         | 1.424     | 1.078      | 1.882      |
| 3          | rs1559810  | 189607048            | T         | 0.468      | 0.401      | G         | 0.03405        | 1.346     | 1.022      | 1.773      |
| 6          | rs2975033  | 29930240             | T         | 0.3611     | 0.2945     | C         | 0.02855        | 1.36      | 1.032      | 1.792      |
| 6          | rs2517715  | 30025418             | G         | 0.3849     | 0.3391     | A         | 0.1513         | 1.216     | 0.9304     | 1.59       |
| 6          | rs3903160  | 30040876             | T         | 0.3492     | 0.3009     | C         | 0.1112         | 1.255     | 0.9485     | 1.661      |
| 6          | rs6457110  | 30041860             | A         | 0.4435     | 0.4082     | T         | 0.2821         | 1.158     | 0.886      | 1.514      |
| 6          | rs3893464  | 30043229             | C         | 0.6157     | 0.5168     | T         | 0.004682       | 1.466     | 1.123      | 1.914      |

| <u>CHR</u> | <u>SNP</u> | <u>Position (nt)</u> | <u>A1</u> | <u>F_A</u> | <u>F_U</u> | <u>A2</u> | <u>trend P</u> | <u>OR</u> | <u>L95</u> | <u>U95</u> |
|------------|------------|----------------------|-----------|------------|------------|-----------|----------------|-----------|------------|------------|
| 6          | rs3823355  | 30050062             | T         | 0.3508     | 0.3025     | C         | 0.1164         | 1.252     | 0.9453     | 1.657      |
| 6          | rs6904029  | 30051046             | A         | 0.3427     | 0.3004     | G         | 0.168          | 1.218     | 0.9197     | 1.614      |
| 6          | rs3823375  | 30052137             | C         | 0.372      | 0.3498     | T         | 0.481          | 1.104     | 0.8381     | 1.455      |
| 6          | rs4947244  | 30062343             | G         | 0.3125     | 0.2859     | C         | 0.3711         | 1.138     | 0.8571     | 1.511      |
| 6          | rs4959039  | 30065048             | G         | 0.316      | 0.2845     | A         | 0.2956         | 1.165     | 0.8752     | 1.55       |
| 6          | rs9357092  | 30092231             | A         | 0.316      | 0.2836     | G         | 0.2792         | 1.171     | 0.8794     | 1.56       |
| 6          | rs9366752  | 30132656             | T         | 0.2642     | 0.2452     | C         | 0.5116         | 1.106     | 0.8185     | 1.495      |
| 6          | rs4711209  | 30155382             | A         | 0.3175     | 0.2846     | G         | 0.2724         | 1.173     | 0.8821     | 1.559      |
| 6          | rs6909253  | 30163622             | G         | 0.4802     | 0.4148     | T         | 0.042          | 1.321     | 1.009      | 1.729      |
| 6          | rs9261394  | 30172541             | A         | 0.488      | 0.4195     | G         | 0.03491        | 1.334     | 1.02       | 1.746      |
| 6          | rs7758128  | 32453261             | A         | 0.02419    | 0.0278     | C         | 0.7386         | 0.8635    | 0.3644     | 2.046      |
| 6          | rs3806156  | 32481676             | T         | 0.3849     | 0.3601     | G         | 0.4465         | 1.108     | 0.8503     | 1.445      |
| 6          | rs2395185  | 32541145             | T         | 0.373      | 0.2933     | G         | 0.008067       | 1.455     | 1.101      | 1.922      |
| 6          | rs2516049  | 32678378             | G         | 0.364      | 0.2936     | A         | 0.02132        | 1.382     | 1.048      | 1.824      |
| 6          | rs532098   | 32686030             | T         | 0.46       | 0.4061     | C         | 0.1177         | 1.223     | 0.9499     | 1.575      |
| 10         | rs706779   | 6138830              | A         | 0.5984     | 0.5321     | G         | 0.04747        | 1.304     | 1.002      | 1.698      |
| 10         | rs7090530  | 6150881              | A         | 0.656      | 0.6111     | C         | 0.1641         | 1.218     | 0.9222     | 1.609      |
| 10         | rs12251307 | 6163501              | C         | 0.8952     | 0.8975     | T         | 0.9095         | 0.9756    | 0.6366     | 1.495      |
| 10         | rs4750005  | 6209691              | T         | 0.3434     | 0.3794     | C         | 0.3198         | 0.8293    | 0.5732     | 1.2        |
| 10         | rs3920615  | 6216786              | A         | 0.5708     | 0.5392     | G         | 0.3613         | 1.132     | 0.8671     | 1.478      |
| 10         | rs4747887  | 6217688              | T         | 0.5586     | 0.5329     | C         | 0.4272         | 1.114     | 0.8534     | 1.454      |
| 10         | rs4750012  | 6217800              | C         | 0.5656     | 0.5344     | T         | 0.3458         | 1.14      | 0.8679     | 1.498      |
| 10         | rs7099083  | 6218242              | G         | 0.556      | 0.5328     | A         | 0.4785         | 1.102     | 0.8421     | 1.443      |
| 11         | rs10830236 | 88540464             | C         | 0.7683     | 0.7058     | T         | 0.04628        | 1.362     | 1.004      | 1.849      |
| 11         | rs11018528 | 88570025             | A         | 0.816      | 0.7422     | G         | 0.01215        | 1.524     | 1.094      | 2.124      |
| 11         | rs10765198 | 88609422             | T         | 0.8175     | 0.7409     | C         | 0.008144       | 1.567     | 1.121      | 2.191      |
| 11         | rs1847134  | 88644901             | A         | 0.7937     | 0.7091     | C         | 0.005991       | 1.549     | 1.131      | 2.121      |
| 11         | rs1393350  | 88650694             | G         | 0.832      | 0.7591     | A         | 0.01061        | 1.563     | 1.107      | 2.207      |
| 11         | rs1806319  | 88677584             | A         | 0.7417     | 0.6558     | G         | 0.009798       | 1.473     | 1.096      | 1.981      |
| 14         | rs8192917  | 24172000             | G         | 0.252      | 0.2423     | A         | 0.7358         | 1.053     | 0.7784     | 1.426      |
| 14         | rs2273844  | 24173254             | A         | 0.254      | 0.2435     | G         | 0.7155         | 1.057     | 0.7834     | 1.427      |
| 21         | rs11203203 | 42709255             | A         | 0.5123     | 0.3959     | G         | 0.0006459      | 1.57      | 1.209      | 2.04       |
| 21         | rs2839511  | 42721590             | A         | 0.296      | 0.2438     | G         | 0.07671        | 1.291     | 0.9721     | 1.716      |

| <u>CHR</u> | <u>SNP</u> | <u>Position (nt)</u> | <u>A1</u> | <u>F_A</u> | <u>F_U</u> | <u>A2</u> | <u>trend P</u> | <u>OR</u> | <u>L95</u> | <u>U95</u> |
|------------|------------|----------------------|-----------|------------|------------|-----------|----------------|-----------|------------|------------|
| 22         | rs229527   | 35911431             | T         | 0.5766     | 0.4348     | G         | 1.55E-05       | 1.821     | 1.382      | 2.399      |
| 22         | rs5756546  | 35919751             | T         | 0.3095     | 0.2205     | C         | 0.001162       | 1.631     | 1.211      | 2.198      |

**SUPPLEMENTARY APPENDIX TABLE 4D.** Allelic association analyses of most significant SNPs comparing generalized vitiligo patients without concomitant other autoimmune diseases versus controls (replication set 1 data)

| <u>CHR</u> | <u>SNP</u> | <u>BP</u> | <u>A1</u> | <u>F_A</u> | <u>F_U</u> | <u>A2</u> | <u>TREND P</u> | <u>OR</u> | <u>L95</u> | <u>U95</u> |
|------------|------------|-----------|-----------|------------|------------|-----------|----------------|-----------|------------|------------|
| 1          | rs301819   | 8424373   | A         | 0.5245     | 0.4396     | G         | 1.97E-05       | 1.384     | 1.191      | 1.608      |
| 1          | rs4908760  | 8448729   | G         | 0.4806     | 0.3842     | A         | 8.77E-07       | 1.457     | 1.253      | 1.695      |
| 1          | rs11121194 | 8492493   | C         | 0.4806     | 0.3906     | T         | 4.54E-06       | 1.42      | 1.221      | 1.65       |
| 1          | rs2476601  | 114179091 | A         | 0.08299    | 0.09034    | G         | 0.5046         | 0.9115    | 0.6941     | 1.197      |
| 3          | rs13076312 | 189571948 | T         | 0.502      | 0.4433     | C         | 0.001979       | 1.279     | 1.094      | 1.495      |
| 3          | rs1464510  | 189595248 | T         | 0.4969     | 0.4408     | G         | 0.003157       | 1.265     | 1.082      | 1.479      |
| 3          | rs13091753 | 189597283 | T         | 0.4494     | 0.4079     | G         | 0.0293         | 1.195     | 1.018      | 1.402      |
| 3          | rs1559810  | 189607048 | T         | 0.4452     | 0.401      | G         | 0.01774        | 1.212     | 1.034      | 1.421      |
| 6          | rs2975033  | 29930240  | T         | 0.352      | 0.2945     | C         | 0.001466       | 1.297     | 1.104      | 1.523      |
| 6          | rs2517715  | 30025418  | G         | 0.4012     | 0.3391     | A         | 0.001134       | 1.294     | 1.107      | 1.511      |
| 6          | rs3903160  | 30040876  | T         | 0.3592     | 0.3009     | C         | 0.001315       | 1.304     | 1.109      | 1.535      |
| 6          | rs6457110  | 30041860  | A         | 0.4821     | 0.4082     | T         | 0.0001587      | 1.347     | 1.153      | 1.573      |
| 6          | rs3893464  | 30043229  | C         | 0.5972     | 0.5168     | T         | 8.57E-05       | 1.354     | 1.163      | 1.577      |
| 6          | rs3823355  | 30050062  | T         | 0.3624     | 0.3025     | C         | 0.00109        | 1.312     | 1.114      | 1.544      |
| 6          | rs6904029  | 30051046  | A         | 0.3583     | 0.3004     | G         | 0.001491       | 1.3       | 1.105      | 1.53       |
| 6          | rs3823375  | 30052137  | C         | 0.41       | 0.3498     | T         | 0.001197       | 1.298     | 1.108      | 1.52       |
| 6          | rs4947244  | 30062343  | G         | 0.3385     | 0.2859     | C         | 0.003327       | 1.277     | 1.084      | 1.505      |
| 6          | rs4959039  | 30065048  | G         | 0.3409     | 0.2845     | A         | 0.001642       | 1.299     | 1.103      | 1.53       |
| 6          | rs9357092  | 30092231  | A         | 0.3395     | 0.2836     | G         | 0.001711       | 1.299     | 1.103      | 1.531      |
| 6          | rs9366752  | 30132656  | T         | 0.3074     | 0.2452     | C         | 0.0003568      | 1.362     | 1.149      | 1.615      |
| 6          | rs4711209  | 30155382  | A         | 0.3384     | 0.2846     | G         | 0.002509       | 1.286     | 1.092      | 1.514      |
| 6          | rs6909253  | 30163622  | G         | 0.4793     | 0.4148     | T         | 0.000668       | 1.311     | 1.121      | 1.534      |
| 6          | rs9261394  | 30172541  | A         | 0.4803     | 0.4195     | G         | 0.001425       | 1.289     | 1.102      | 1.507      |

| <u>CHR</u> | <u>SNP</u> | <u>Position (nt)</u> | <u>A1</u> | <u>F_A</u> | <u>F_U</u> | <u>A2</u> | <u>trend P</u> | <u>OR</u> | <u>L95</u> | <u>U95</u> |
|------------|------------|----------------------|-----------|------------|------------|-----------|----------------|-----------|------------|------------|
| 6          | rs7758128  | 32453261             | A         | 0.05532    | 0.0278     | C         | 0.0002353      | 2.002     | 1.371      | 2.923      |
| 6          | rs3806156  | 32481676             | T         | 0.4055     | 0.3601     | G         | 0.01827        | 1.202     | 1.031      | 1.401      |
| 6          | rs2395185  | 32541145             | T         | 0.3016     | 0.2933     | G         | 0.6327         | 1.042     | 0.8808     | 1.232      |
| 6          | rs2516049  | 32678378             | G         | 0.32       | 0.2936     | A         | 0.139          | 1.133     | 0.9602     | 1.336      |
| 6          | rs532098   | 32686030             | T         | 0.4719     | 0.4061     | C         | 0.001224       | 1.275     | 1.1        | 1.478      |
| 10         | rs706779   | 6138830              | A         | 0.5443     | 0.5321     | G         | 0.5365         | 1.048     | 0.9024     | 1.218      |
| 10         | rs7090530  | 6150881              | A         | 0.6124     | 0.6111     | C         | 0.9471         | 1.005     | 0.8598     | 1.175      |
| 10         | rs12251307 | 6163501              | C         | 0.8789     | 0.8975     | T         | 0.1351         | 0.8386    | 0.6654     | 1.057      |
| 10         | rs4750005  | 6209691              | T         | 0.4061     | 0.3794     | C         | 0.1884         | 1.139     | 0.9379     | 1.384      |
| 10         | rs3920615  | 6216786              | A         | 0.5358     | 0.5392     | G         | 0.8666         | 0.987     | 0.8472     | 1.15       |
| 10         | rs4747887  | 6217688              | T         | 0.5337     | 0.5329     | C         | 0.9658         | 1.003     | 0.8605     | 1.17       |
| 10         | rs4750012  | 6217800              | C         | 0.5311     | 0.5344     | T         | 0.8634         | 0.9865    | 0.845      | 1.152      |
| 10         | rs7099083  | 6218242              | G         | 0.5328     | 0.5328     | A         | 1              | 1         | 0.8575     | 1.166      |
| 11         | rs10830236 | 88540464             | C         | 0.7473     | 0.7058     | T         | 0.02231        | 1.223     | 1.029      | 1.454      |
| 11         | rs11018528 | 88570025             | A         | 0.7774     | 0.7422     | G         | 0.03734        | 1.211     | 1.011      | 1.45       |
| 11         | rs10765198 | 88609422             | T         | 0.7832     | 0.7409     | C         | 0.01137        | 1.263     | 1.054      | 1.513      |
| 11         | rs1847134  | 88644901             | A         | 0.7732     | 0.7091     | C         | 0.000286       | 1.382     | 1.159      | 1.647      |
| 11         | rs1393350  | 88650694             | G         | 0.8233     | 0.7591     | A         | 8.56E-05       | 1.466     | 1.21       | 1.777      |
| 11         | rs1806319  | 88677584             | A         | 0.7172     | 0.6558     | G         | 0.00102        | 1.323     | 1.119      | 1.565      |
| 14         | rs8192917  | 24172000             | G         | 0.3078     | 0.2423     | A         | 0.0001198      | 1.396     | 1.177      | 1.656      |
| 14         | rs2273844  | 24173254             | A         | 0.3102     | 0.2435     | G         | 9.37E-05       | 1.401     | 1.182      | 1.661      |
| 21         | rs11203203 | 42709255             | A         | 0.4359     | 0.3959     | G         | 0.04164        | 1.173     | 1.006      | 1.367      |
| 21         | rs2839511  | 42721590             | A         | 0.2597     | 0.2438     | G         | 0.3504         | 1.085     | 0.9143     | 1.287      |
| 22         | rs229527   | 35911431             | T         | 0.5302     | 0.4348     | G         | 6.59E-07       | 1.493     | 1.273      | 1.75       |
| 22         | rs5756546  | 35919751             | T         | 0.2818     | 0.2205     | C         | 0.0001825      | 1.409     | 1.176      | 1.687      |

A1, minor allele; F\_A, minor allele frequency in patients; F\_U, minor allele frequency in controls; A2, major allele

Trend P values were calculated using the PLINK<sup>1</sup> unadjusted Cochran-Armitage trend test. Trend P values in Supplementary Appendix Tables 4A and 4B were further corrected by the genomic inflation factor of 1.048 using the genomic control method.<sup>7</sup>

**SUPPLEMENTARY APPENDIX TABLE 5. Association Analysis of Non-Synonymous TYR SNPs**

| S                 | N        | P | Location (nt) | Risk-Allele | Genomewide Association Study |                        |                    | Replication Sets      |                     |                   |                     | Combined Analysis (Genomewide Association Study + Replication Sets 1 & 2) |                     |         |                     |
|-------------------|----------|---|---------------|-------------|------------------------------|------------------------|--------------------|-----------------------|---------------------|-------------------|---------------------|---------------------------------------------------------------------------|---------------------|---------|---------------------|
|                   |          |   |               |             | Risk-Allele Frequency        |                        | EIGENSTRAT P value | PLINK P value         | Odds Ratio (95% CI) | Replication Set 1 |                     | Replication Set 2                                                         |                     | P value | Odds Ratio (95% CI) |
|                   |          |   |               |             | patients (N=1392)            | controls (N=2629)      |                    |                       |                     | P value           | Odds Ratio (95% CI) | P value                                                                   | Odds Ratio (95% CI) |         |                     |
| rs1042602 (S192Y) | 88551344 | C | 0.64          | 0.63        | $1.65 \times 10^{-8}$        | 0.62                   | 1.03 (0.93-1.13)   | 0.29                  | 1.08 (0.94-1.24)    | 0.62              | 1.07 (0.87-1.31)    | 0.26                                                                      | 1.05 (0.97-1.13)    |         |                     |
| rs1126809 (R402Q) | 88657609 | G | 0.76          | 0.69        | nd                           | $5.92 \times 10^{-12}$ | 1.46 (1.31-1.62)   | $4.28 \times 10^{-7}$ | 1.58 (1.32-1.88)    | nd                | nd                  | $1.13 \times 10^{-17}$                                                    | 1.48 (1.35-1.61)    |         |                     |

Genotypes for rs1126809 in the genomewide association study and replication set 1 were imputed using MaCH,<sup>4</sup> ver.1.0 (<http://www.sph.umich.edu/csg/abecasis/MACH/download/>) based on patterns of haplotype variation in the HapMap<sup>5</sup> CEU samples (release 24). For rs1042602 the combined analysis was performed using data from the genomewide association study, replication set 1, and replication set 2. For rs1126809, the combined analysis is based only on data from the genomewide association study and replication set 1, as data for rs1126809 could not be imputed for replication set 2.

**SUPPLEMENTARY APPENDIX TABLE 6.** Linkage disequilibrium among TYR region SNPs

| <u>Locus 1</u> | <u>Locus 2</u> | <u>r<sup>2</sup></u> | <u>D'</u> | <u>lod</u> | <u>CI<sub>lower</sub></u> | <u>CI<sub>upper</sub></u> | <u>Distance (bp)</u> |
|----------------|----------------|----------------------|-----------|------------|---------------------------|---------------------------|----------------------|
| rs10830236     | rs1042602      | 0.259                | 0.987     | 348.04     | 0.97                      | 1                         | 10880                |
| rs10830236     | rs11018528     | 0.772                | 0.967     | 1032.39    | 0.95                      | 0.98                      | 29561                |
| rs10830236     | rs10765198     | 0.71                 | 0.944     | 906.66     | 0.93                      | 0.96                      | 68958                |
| rs10830236     | rs1847134      | 0.672                | 0.864     | 830.62     | 0.84                      | 0.89                      | 104437               |
| rs10830236     | rs1393350      | 0.614                | 0.937     | 747.57     | 0.92                      | 0.96                      | 110230               |
| rs10830236     | rs1126809      | 0.663                | 0.865     | 815.41     | 0.84                      | 0.89                      | 117145               |
| rs10830236     | rs1806319      | 0.674                | 0.89      | 863.22     | 0.87                      | 0.91                      | 137120               |
| rs1042602      | rs11018528     | 0.215                | 0.99      | 286.59     | 0.97                      | 1                         | 18681                |
| rs1042602      | rs10765198     | 0.206                | 0.988     | 269.53     | 0.97                      | 1                         | 58078                |
| rs1042602      | rs1847134      | 0.184                | 0.876     | 214.96     | 0.84                      | 0.91                      | 93557                |
| rs1042602      | rs1393350      | 0.182                | 0.991     | 239.31     | 0.97                      | 1                         | 99350                |
| rs1042602      | rs1126809      | 0.181                | 0.878     | 213.08     | 0.84                      | 0.91                      | 106265               |
| rs1042602      | rs1806319      | 0.233                | 0.865     | 277.81     | 0.83                      | 0.89                      | 126240               |
| rs11018528     | rs10765198     | 0.916                | 0.975     | 1287.01    | 0.96                      | 0.99                      | 39397                |
| rs11018528     | rs1847134      | 0.87                 | 0.974     | 1207.46    | 0.96                      | 0.99                      | 74876                |
| rs11018528     | rs1393350      | 0.779                | 0.959     | 991.65     | 0.94                      | 0.97                      | 80669                |
| rs11018528     | rs1126809      | 0.859                | 0.96      | 1175.37    | 0.94                      | 0.97                      | 87584                |
| rs11018528     | rs1806319      | 0.652                | 0.962     | 849.32     | 0.94                      | 0.98                      | 107559               |
| rs10765198     | rs1847134      | 0.828                | 0.967     | 1114.35    | 0.95                      | 0.98                      | 35479                |
| rs10765198     | rs1393350      | 0.835                | 0.975     | 1094.39    | 0.96                      | 0.99                      | 41272                |
| rs10765198     | rs1126809      | 0.816                | 0.953     | 1083.04    | 0.94                      | 0.97                      | 48187                |
| rs10765198     | rs1806319      | 0.632                | 0.964     | 818.07     | 0.95                      | 0.98                      | 68162                |
| rs1847134      | rs1393350      | 0.775                | 0.998     | 1042.19    | 0.98                      | 1                         | 5793                 |
| rs1847134      | rs1126809      | 0.983                | 0.999     | 1527.58    | 0.98                      | 1                         | 12708                |
| rs1847134      | rs1806319      | 0.749                | 0.988     | 1044.89    | 0.97                      | 1                         | 32683                |
| rs1393350      | rs1126809      | 0.789                | 1         | 1070.26    | 0.99                      | 1                         | 6915                 |
| rs1393350      | rs1806319      | 0.588                | 0.992     | 772.06     | 0.98                      | 1                         | 26890                |
| rs1126809      | rs1806319      | 0.746                | 0.994     | 1048.81    | 0.98                      | 1                         | 19975                |

**Notes:**

Locus 1 and Locus 2 are the two loci under comparison

$r^2$  is the correlation coefficient between the two loci

$D'$  is the value of D prime between the two loci

$\text{lod}$  is the log of the likelihood odds ratio, a measure of confidence in the value of  $D'$

$CI_{\text{lower}}$  is 95% confidence lower bound on  $D'$

$CI_{\text{upper}}$  is the 95% confidence upper bound on  $D'$

Distance is bp separating the two loci

**Supplementary Table 7. Association of *NALP1* SNPs with Generalized Vitiligo in the Genomewide Association Study and Replication Analyses**

| SNP <sup>a</sup> | Location (nt) | Risk-Allele <sup>a</sup> | Genomewide Association Study (1392 patients, 2629 controls) |          |                            |                                  | Replication Sets                                |                                  |                                                       |                                  |                                                                     |                                  |                                                                                                               |                                  |
|------------------|---------------|--------------------------|-------------------------------------------------------------|----------|----------------------------|----------------------------------|-------------------------------------------------|----------------------------------|-------------------------------------------------------|----------------------------------|---------------------------------------------------------------------|----------------------------------|---------------------------------------------------------------------------------------------------------------|----------------------------------|
|                  |               |                          | Risk-Allele Frequency                                       |          | PLINK P value <sup>b</sup> | Odds Ratio (95% CI) <sup>c</sup> | Replication Set 1 (647 patients, 1056 controls) |                                  | Replication Set 2 (183 trios, 332 multiplex families) |                                  | Replication Set 2; Romania subset (36 trios, 43 multiplex families) |                                  | Replication Set 2; Romania subset with concomitant other autoimmune diseases (6 trios, 29 multiplex families) |                                  |
|                  |               |                          | patients                                                    | controls |                            |                                  | P value <sup>d</sup>                            | Odds Ratio (95% CI) <sup>c</sup> | P value <sup>e</sup>                                  | Odds Ratio (95% CI) <sup>f</sup> | P value <sup>e</sup>                                                | Odds Ratio (95% CI) <sup>f</sup> | P value <sup>e</sup>                                                                                          | Odds Ratio (95% CI) <sup>f</sup> |
| rs6502867        | 5361052       | A                        | 0.764                                                       | 0.750    | 0.17                       | 1.08 (0.97-1.20)                 | 2.39 x 10 <sup>-2</sup>                         | 0.83 (0.71-0.98)                 | 2.92 x 10 <sup>-3</sup>                               | 1.45 (1.15-1.84)                 | 8.72 x 10 <sup>-3</sup>                                             | 1.58 (0.86-2.94)                 | 1.00 x 10 <sup>-2</sup>                                                                                       | 2.82 (1.02-8.29)                 |
| rs12150220       | 5426091       | A                        | 0.466                                                       | 0.446    | 0.09                       | 1.09 (0.99-1.19)                 | 0.21                                            | 0.91 (0.79-1.05)                 | 1.76 x 10 <sup>-3</sup>                               | 1.33 (1.09-1.62)                 | 2.42 x 10 <sup>-3</sup>                                             | 1.84 (1.08-3.15)                 | 1.26 x 10 <sup>-2</sup>                                                                                       | 2.72 (1.07-6.92)                 |
| rs11078575       | 5426509       | C                        | 0.488                                                       | 0.470    | 0.08                       | 1.09 (0.99-1.20)                 | nd                                              |                                  | nd                                                    |                                  | nd                                                                  |                                  |                                                                                                               |                                  |
| rs2670660        | 5459730       | C                        | nd                                                          | nd       | nd                         |                                  | 0.44                                            | 0.95 (0.82-1.09)                 | 6.65 x 10 <sup>-4</sup>                               | 1.43 (1.17-1.76)                 | 8.34 x 10 <sup>-3</sup>                                             | 1.92 (1.10-3.36)                 | 9.86 x 10 <sup>-3</sup>                                                                                       | 2.89 (1.14-7.31)                 |
| rs878329         | 5493974       | G                        | 0.463                                                       | 0.445    | 0.11                       | 1.08 (0.99-1.19)                 | nd                                              |                                  | nd                                                    |                                  | nd                                                                  |                                  |                                                                                                               |                                  |
| rs8182352        | 5495711       | G                        | nd                                                          | nd       | nd                         |                                  | 0.72                                            | 0.98 (0.85-1.12)                 | 5.64 x 10 <sup>-4</sup>                               | 1.48 (1.22-1.80)                 | 8.92 x 10 <sup>-3</sup>                                             | 1.99 (1.17-3.38)                 | 1.86 x 10 <sup>-2</sup>                                                                                       | 3.22 (1.25-8.31)                 |
| rs4790796        | 5496043       | A                        | 0.459                                                       | 0.442    | 0.14                       | 1.08 (0.98-1.18)                 | nd                                              |                                  | nd                                                    |                                  | nd                                                                  |                                  |                                                                                                               |                                  |

<sup>a</sup> SNP high-risk alleles are defined as those associated with generalized vitiligo in previous studies.<sup>15,16</sup> <sup>b</sup> PLINK<sup>1</sup> Cochran-Armitage trend test statistics, calculated after GEM<sup>2</sup> correction of the genomewide dataset, were adjusted for the genomic inflation factor of 1.048 by use of the genomic control method.<sup>7</sup> <sup>c</sup> Odds ratios were calculated from the coefficients of the logistic regression equations; parentheses indicate 95% confidence intervals. <sup>d</sup> P values were calculated using the Cochran-Armitage trend test. <sup>e</sup> P values were calculated using the family based association test (FBAT),<sup>8</sup> version 1.5.5. <sup>f</sup> Odds ratios were calculated by conditional logistic regression analysis.<sup>9</sup> Genotypes for rs12150220, rs11078575, rs878329, and rs4790796 were imputed in the genomewide association study by use of MaCH,<sup>4</sup> ver.1.0 (<http://www.sph.umich.edu/csg/abecasis/MACH/download/>), based on patterns of haplotype variation in the HapMap<sup>5</sup> CEU samples (release 24); SNPs rs2670660 and rs8182352 are not represented in the HapMap data and thus could not be imputed. SNP positions are from Build 36.1 from the National Center for Biotechnology Information. nd, not determined.
